# Supplementary material for: Rheological comparison between control and Dupuytren fibroblasts when plated in circular micropatterns using atomic force microscopy
Source: Frontiers journal article supplement (doi:10.3389/fphy.2022.1052203), 2022-11-22
Supplement: Data_Sheet_1.docx [file Data_Sheet_1.docx]

**Supplementary material**

Data processing

To extract the Young’s modulus from the obtained curves (d-z), we used the following approach based on Hertz’s model. Firstly, to compute the force (F) applied by the cantilever, the following relation is employed:

and the indentation (δ) is calculated:

where is the deflection offset and the cantilever displacement at the tip-sample contact point. To analyze the F-δ curves, Hertz’s model for spherical indenters is used:

where R is the radius of the curvature in spherical or parabolic probes, ν is the Poisson's ratio (which is considered 0.5 for cells) and E is the elastic or Young's modulus of the sample.

Contact point determination is based on the inspection of the force curve, where each point is considered as a potential contact point. For each potential contact point, the d-z curve is converted into F-δ and then fitted with the appropriate contact mechanics model, in our case Hertz fit for spherical indenters.


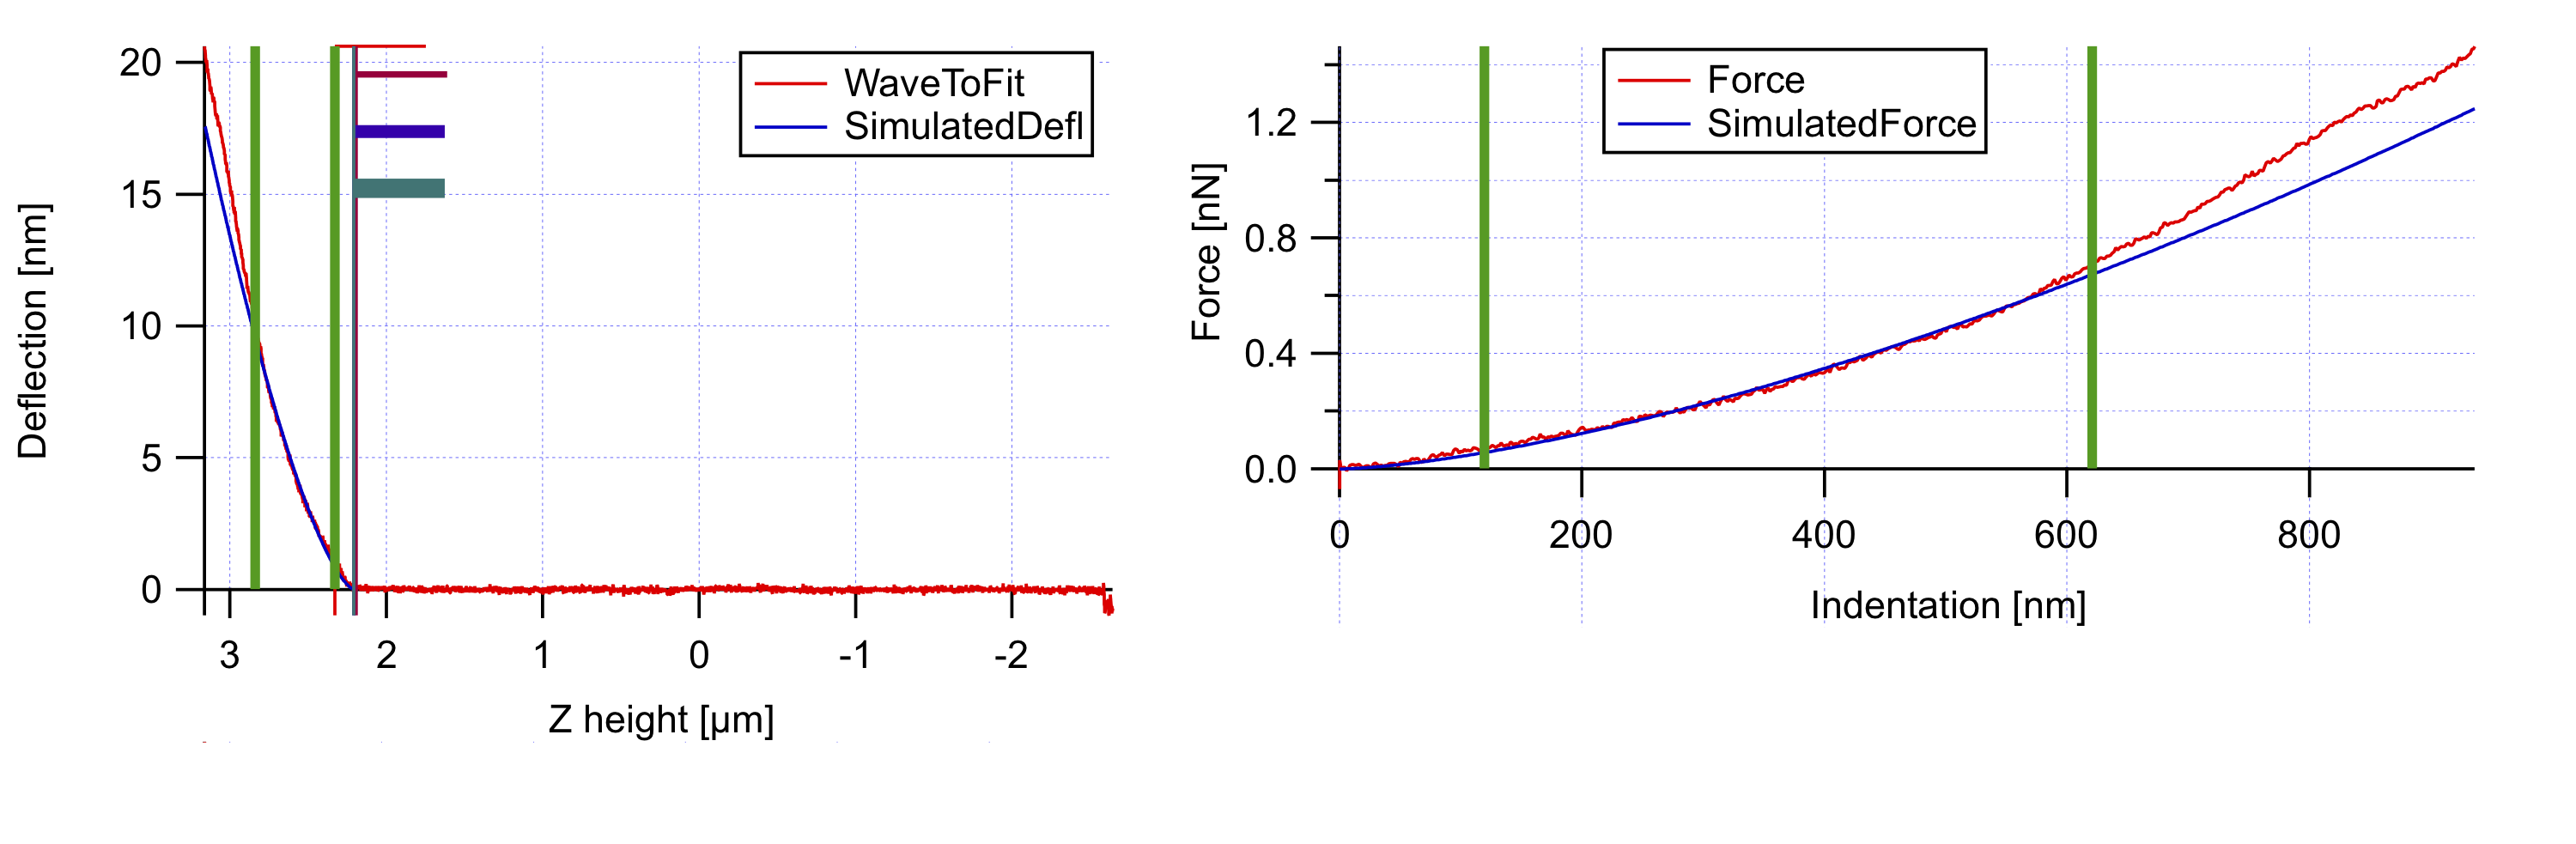


Figure 1 Approach force curve in red with the Hertz fit in blue. Vertical green lines limit the analysis range of the curve and green, blue and red flags represent the estimations of the contact point (left). Force versus indentation display after contact point determination, original data are in red, blue curve is Hertz fit and the vertical green lines delimit the analysis range (right).

Sweep modulation

In sweep modulation a sinusoidal modulation with increasing frequency is applied to the z-piezo while the tip is in contact. Typically, we use a dwell time of 8.7 seconds, where during the first second no modulation is applied since the cell creeps substantially. Then the frequency is swept from 1Hz to 1kHz, where for each frequency only one cycle is applied. The frequency series is designed as a geometric series, so that in each decade we use the same number of frequencies. Typically, the frequency increases by a factor of 1.15 from cycle to cycle, which results in 17 frequency values per decade, which are equally spaced on a logarithmic scale.

The elastic and viscous modulus, denoted here as loss and the storage modulus, are a function of frequency and in the simplest case we expect a power law behavior. However, in our case at frequencies beyond 10 Hz (depending on experimental parameters especially dimension of the cantilever) hydrodynamic drag of the cantilever will become very prominent. Thus, we employ the structural damping model as has been introduced to AFM rheology by Alcaraz *et al*. (Alcaraz *et al.*, 2003). Here, the complex modulus G* is written as:

where E* is the complex elastic modulus; E0 is the scale factor of the storage and loss moduli; the imaginary unit; η the loss tangent; ω0 in the frequency scale (in our case 1 Hz); α the power law exponent of the sample and μ the Newtonian viscous term, which will depend on the shape of the cantilever and the viscosity of the medium. The real part represents the storage modulus and the imaginary part corresponds to apparent loss modulus, which has two contributions; (1) from the sample, which scales with the same power law exponent as the storage modulus, and the hydrodynamics, which is directly proportional to the frequency. Thus, we can first obtain the power law exponent by fitting the storage modulus as a function of frequency, and then in a second step obtain the loss tangent and the strength of the hydrodynamic damping of the cantilever .


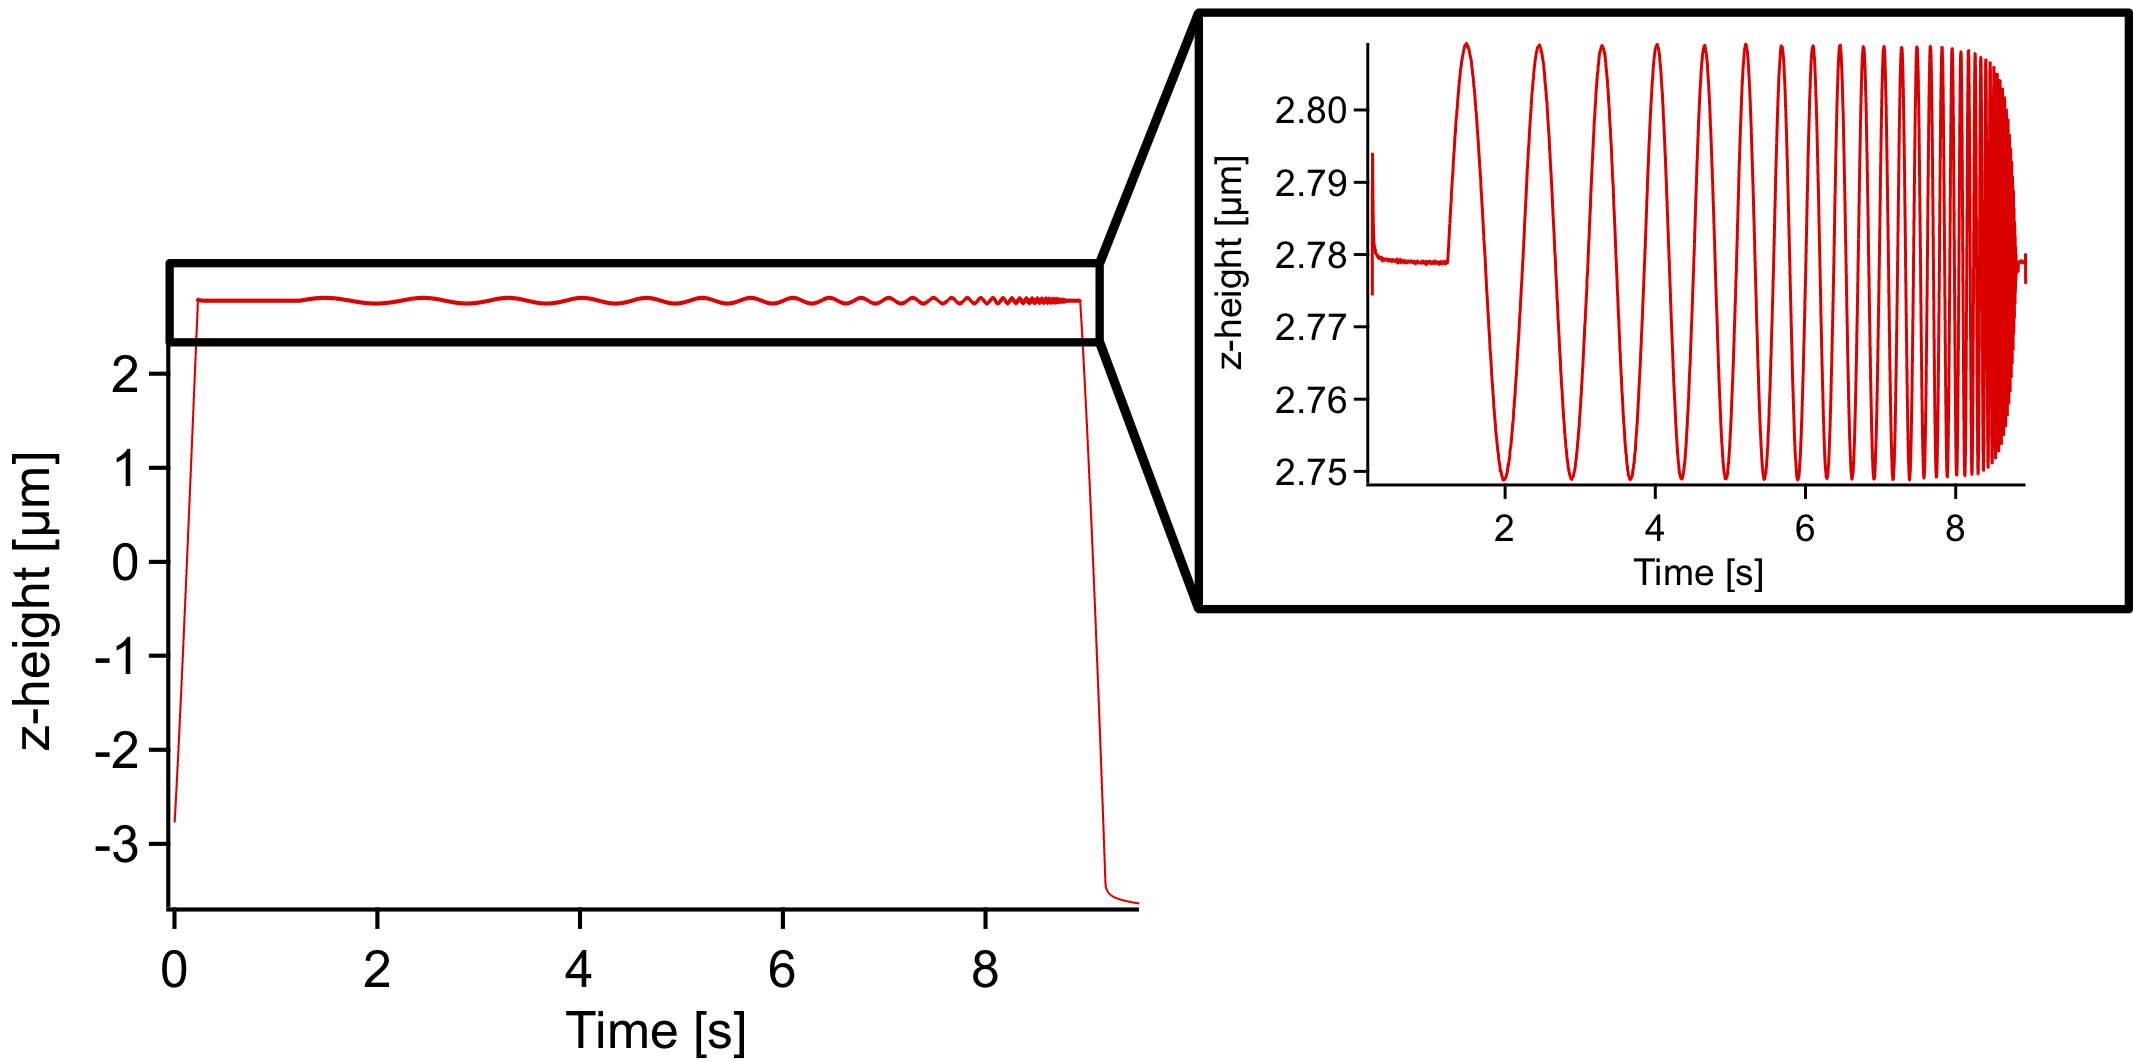


Figure 2 Sweep modulation AFM methodology. Representation of the piezo movement in z direction versus time.


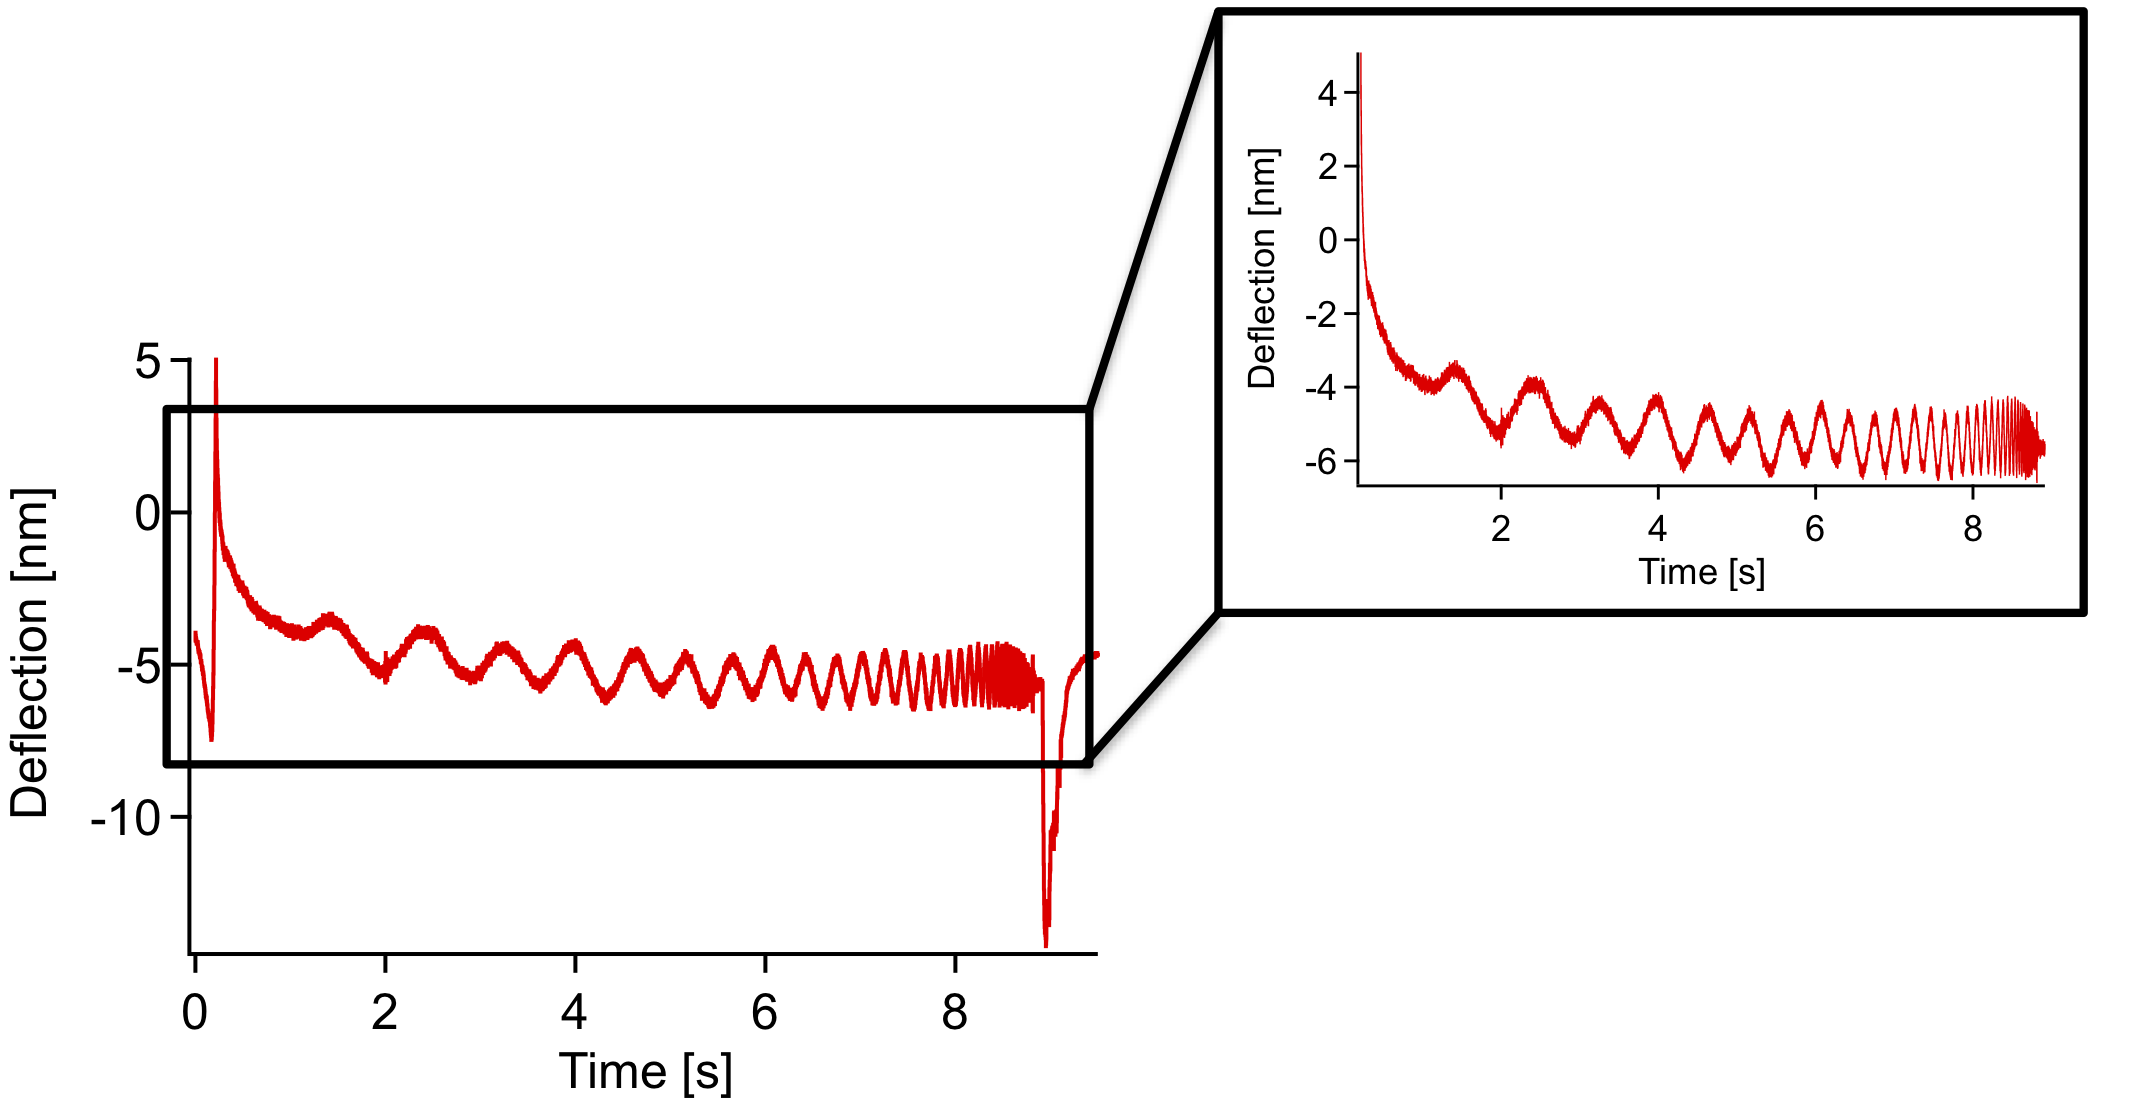


Figure 3 Sweep modulation AFM methodology. Deflection versus time. The deflection is the cantilever bending and it can be extrapolated to cell response. The highlighted area in the black box is the zoom of the sweep step. Deflection reflects cantilever movement over time.


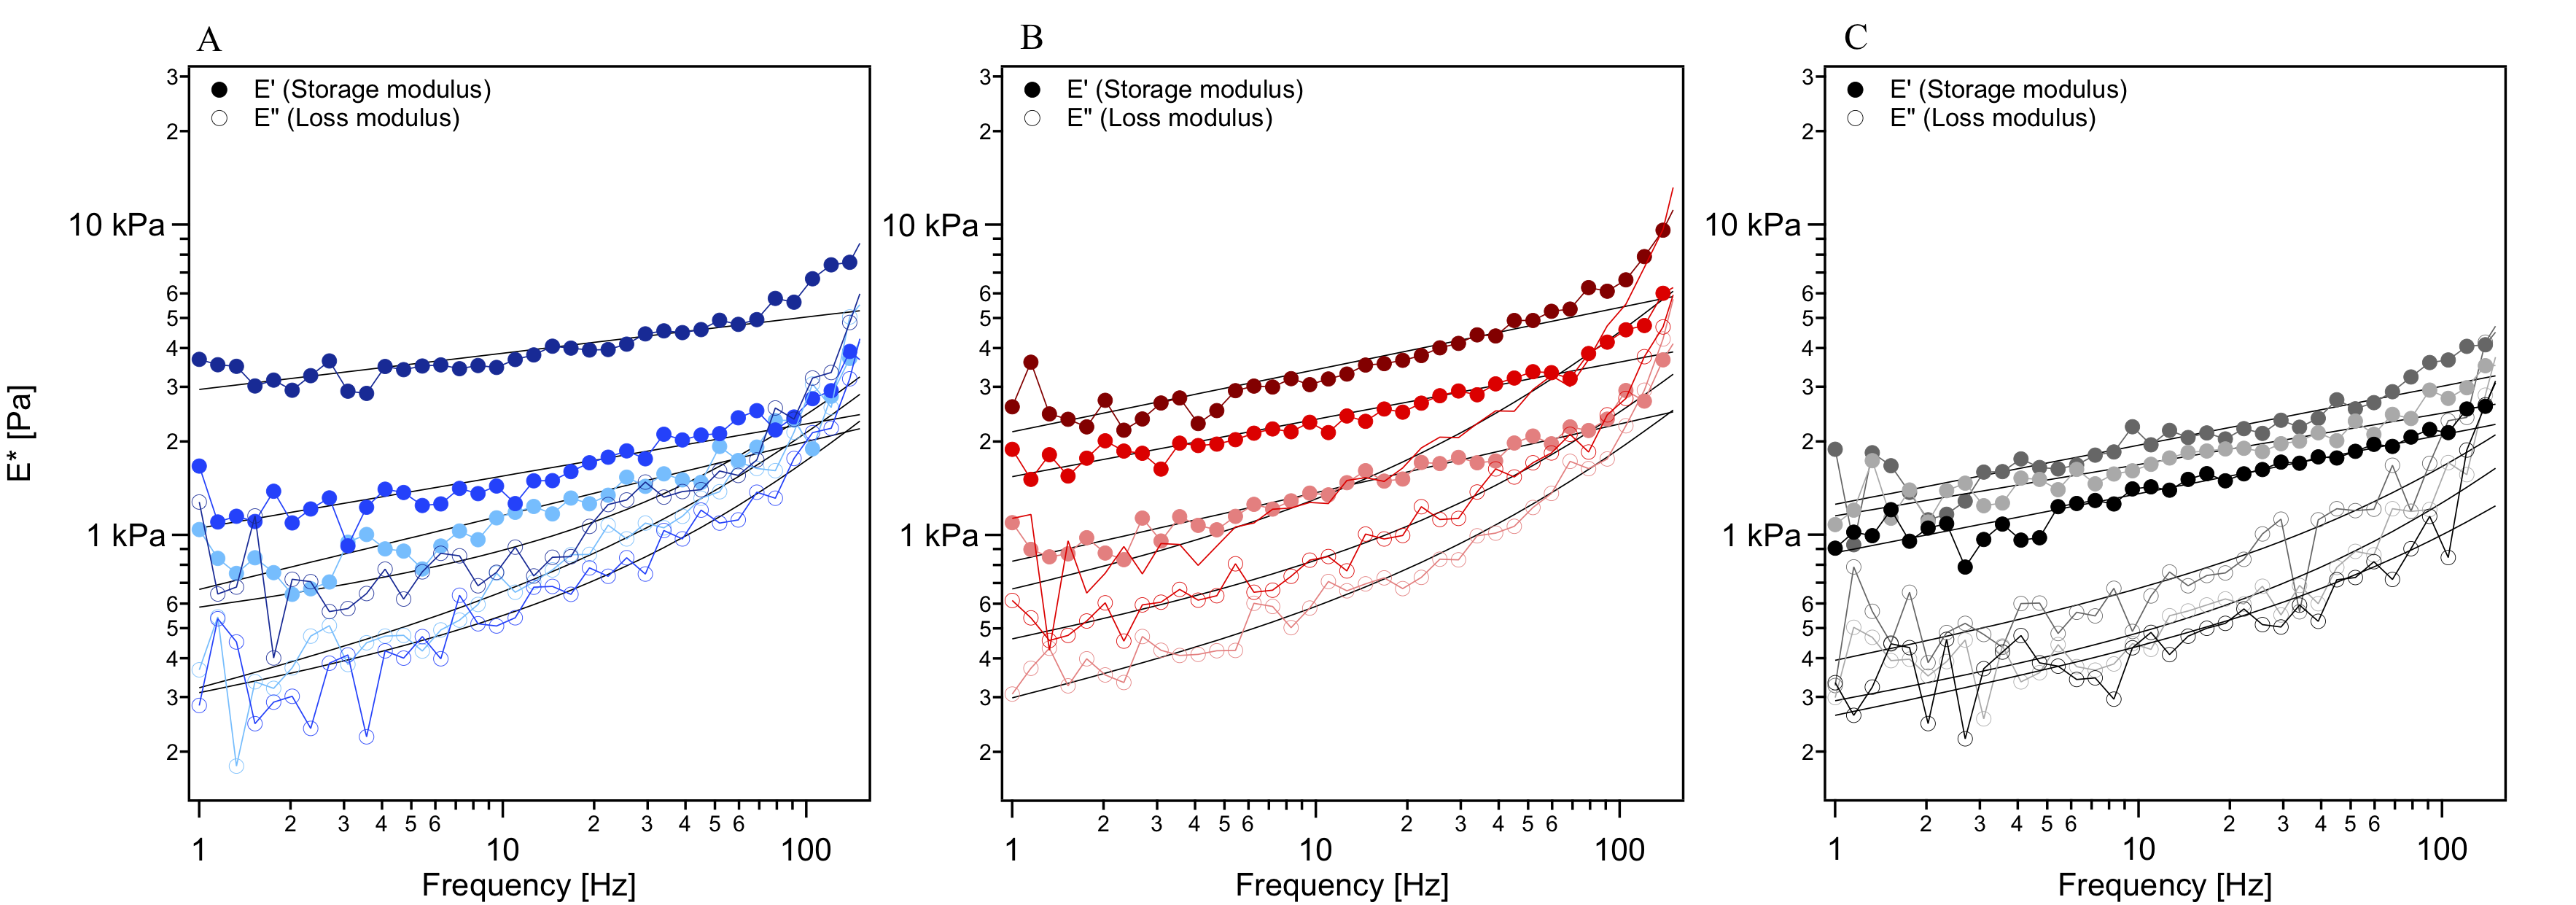


Figure 4 Frequency-dependent of complex elastic moduli of the A) control fibroblasts, B) scar fibroblasts and C) Dupuytren fibroblasts. Close and open circles represent the storage (E’) and loss modulus (E”), respectively. From lightest to darkest color display the modulus from the cells patterned in the 25, 35 and 45 µm diameter circle patterns, respectively (N = 15). Data shown after viscous drag correction.


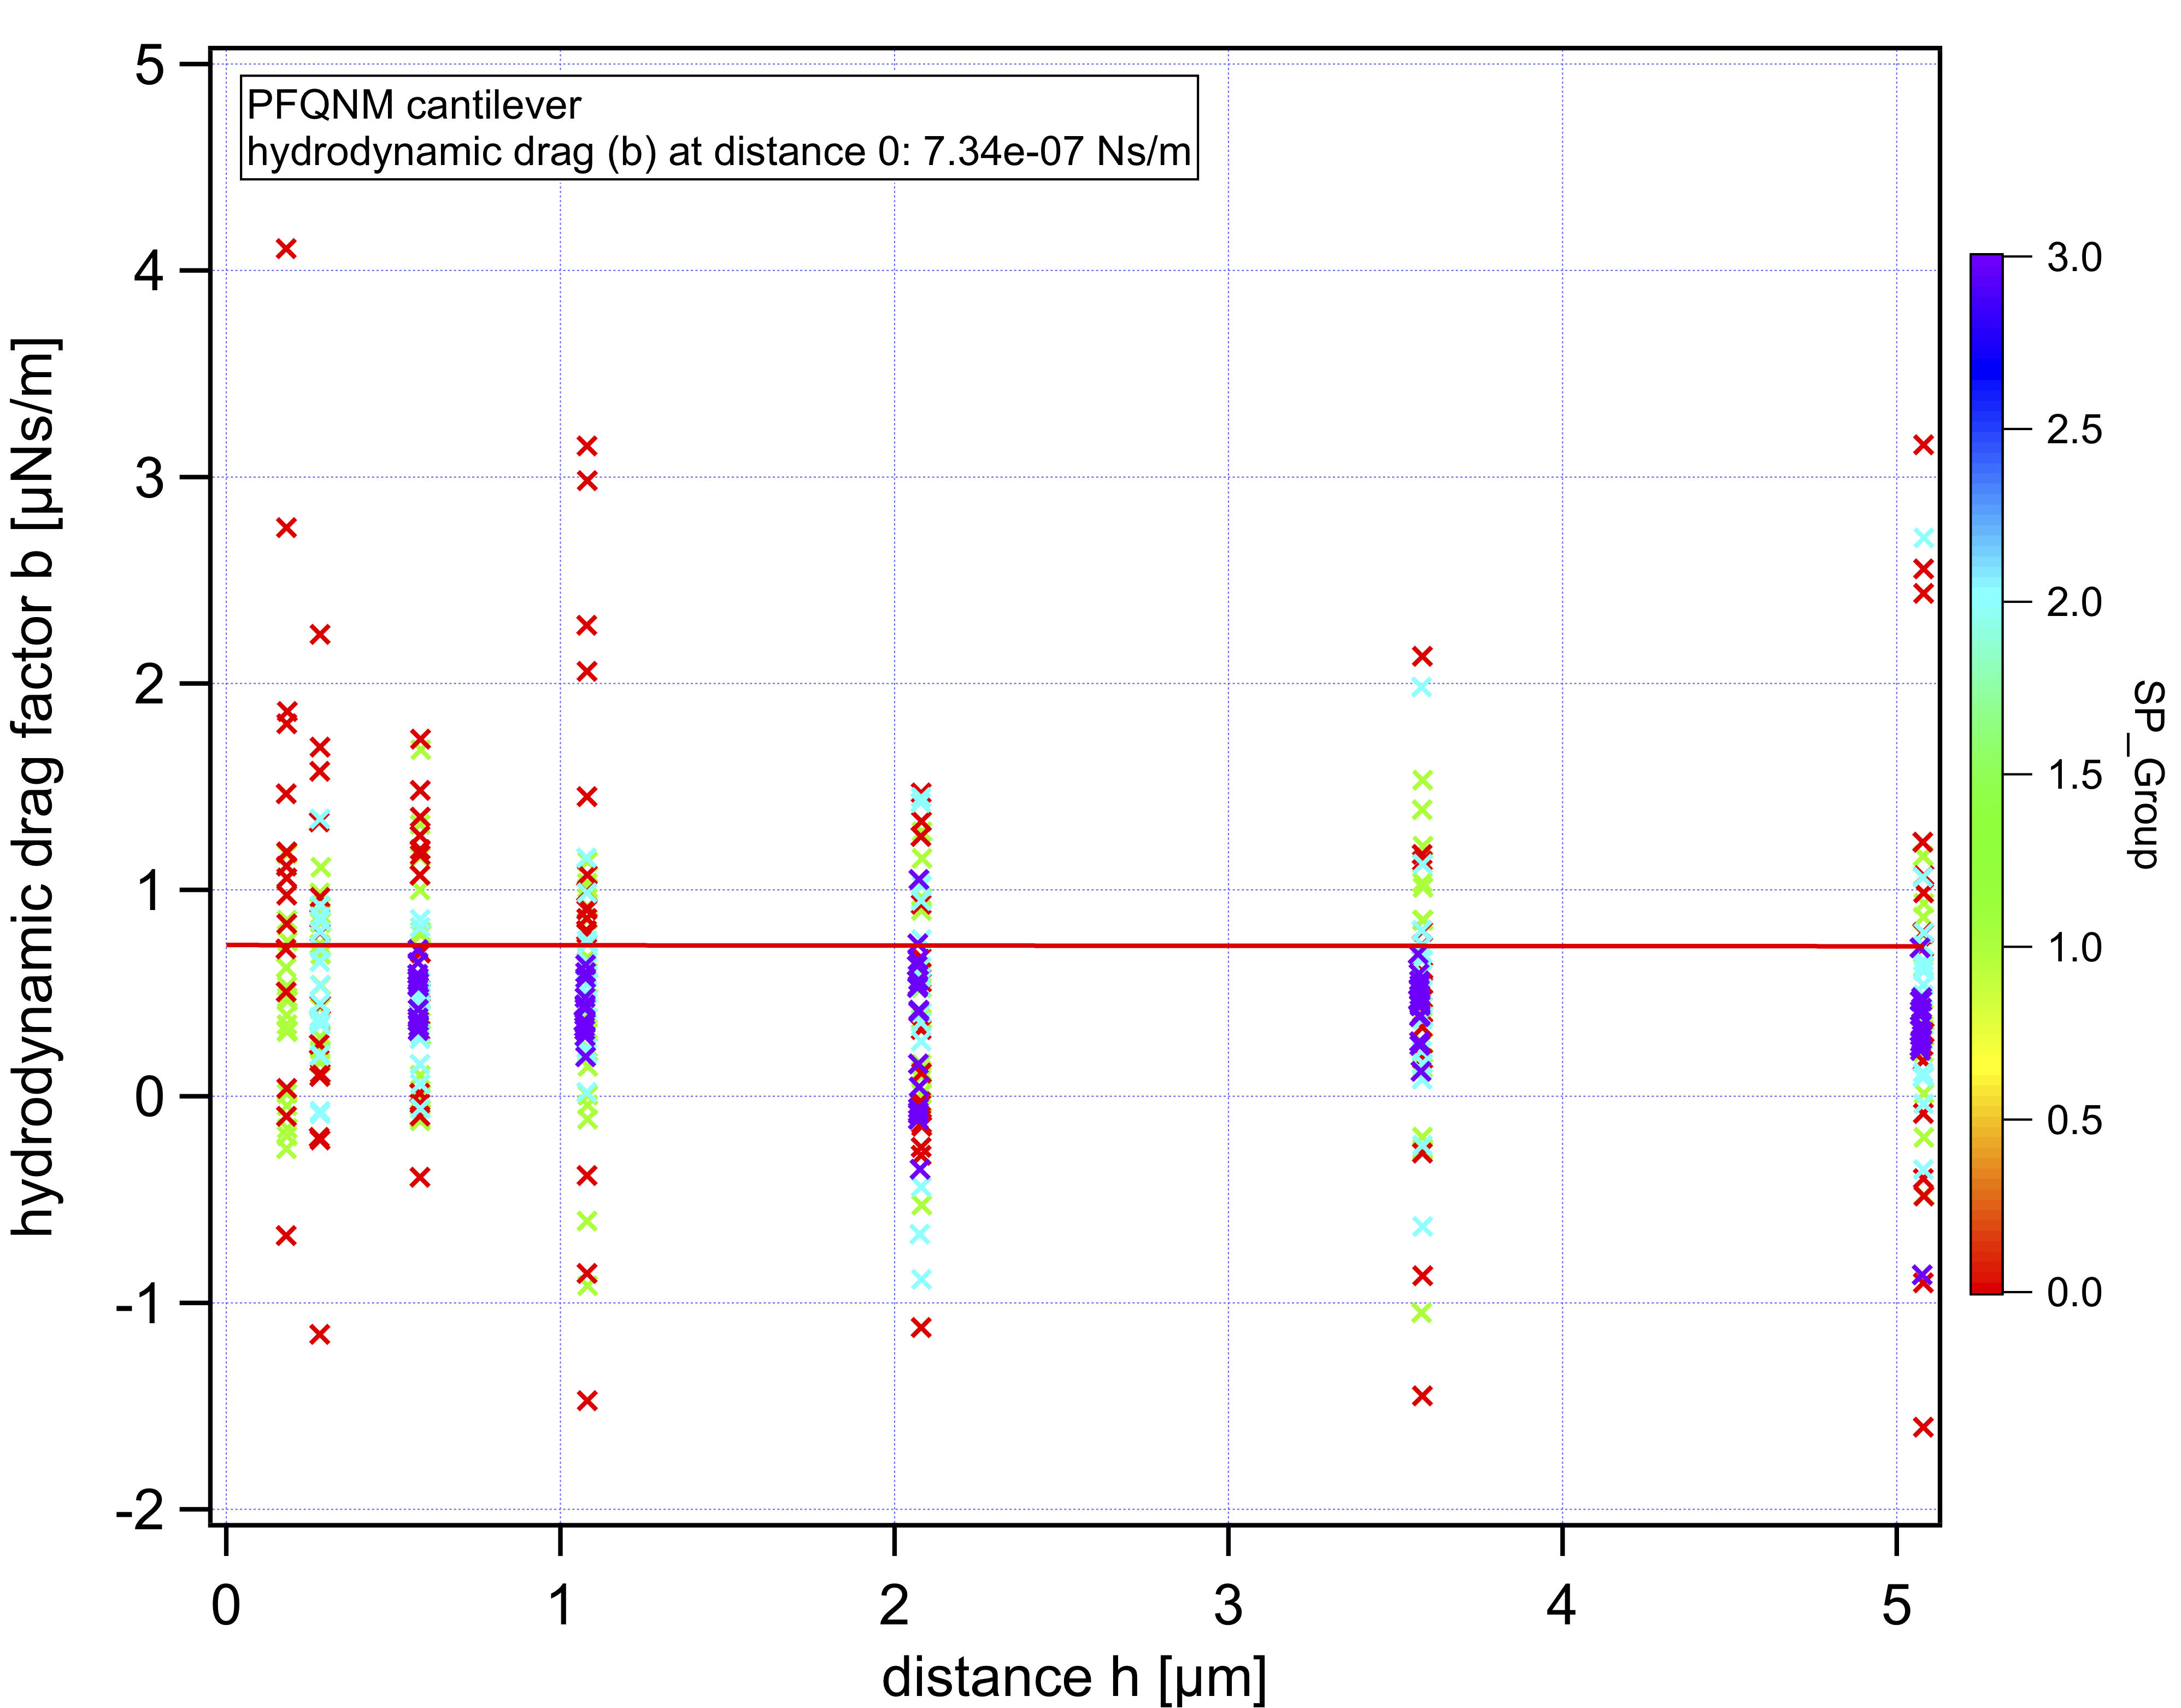


Figure 5 Hydrodynamic drag factor b(h) at different tip-substrate distances (h) for PFQNM cantilevers above glass. The value of b(0) is so small for this cantilever that the correction is almost negligible (Alcaraz *et al.*, 2002).


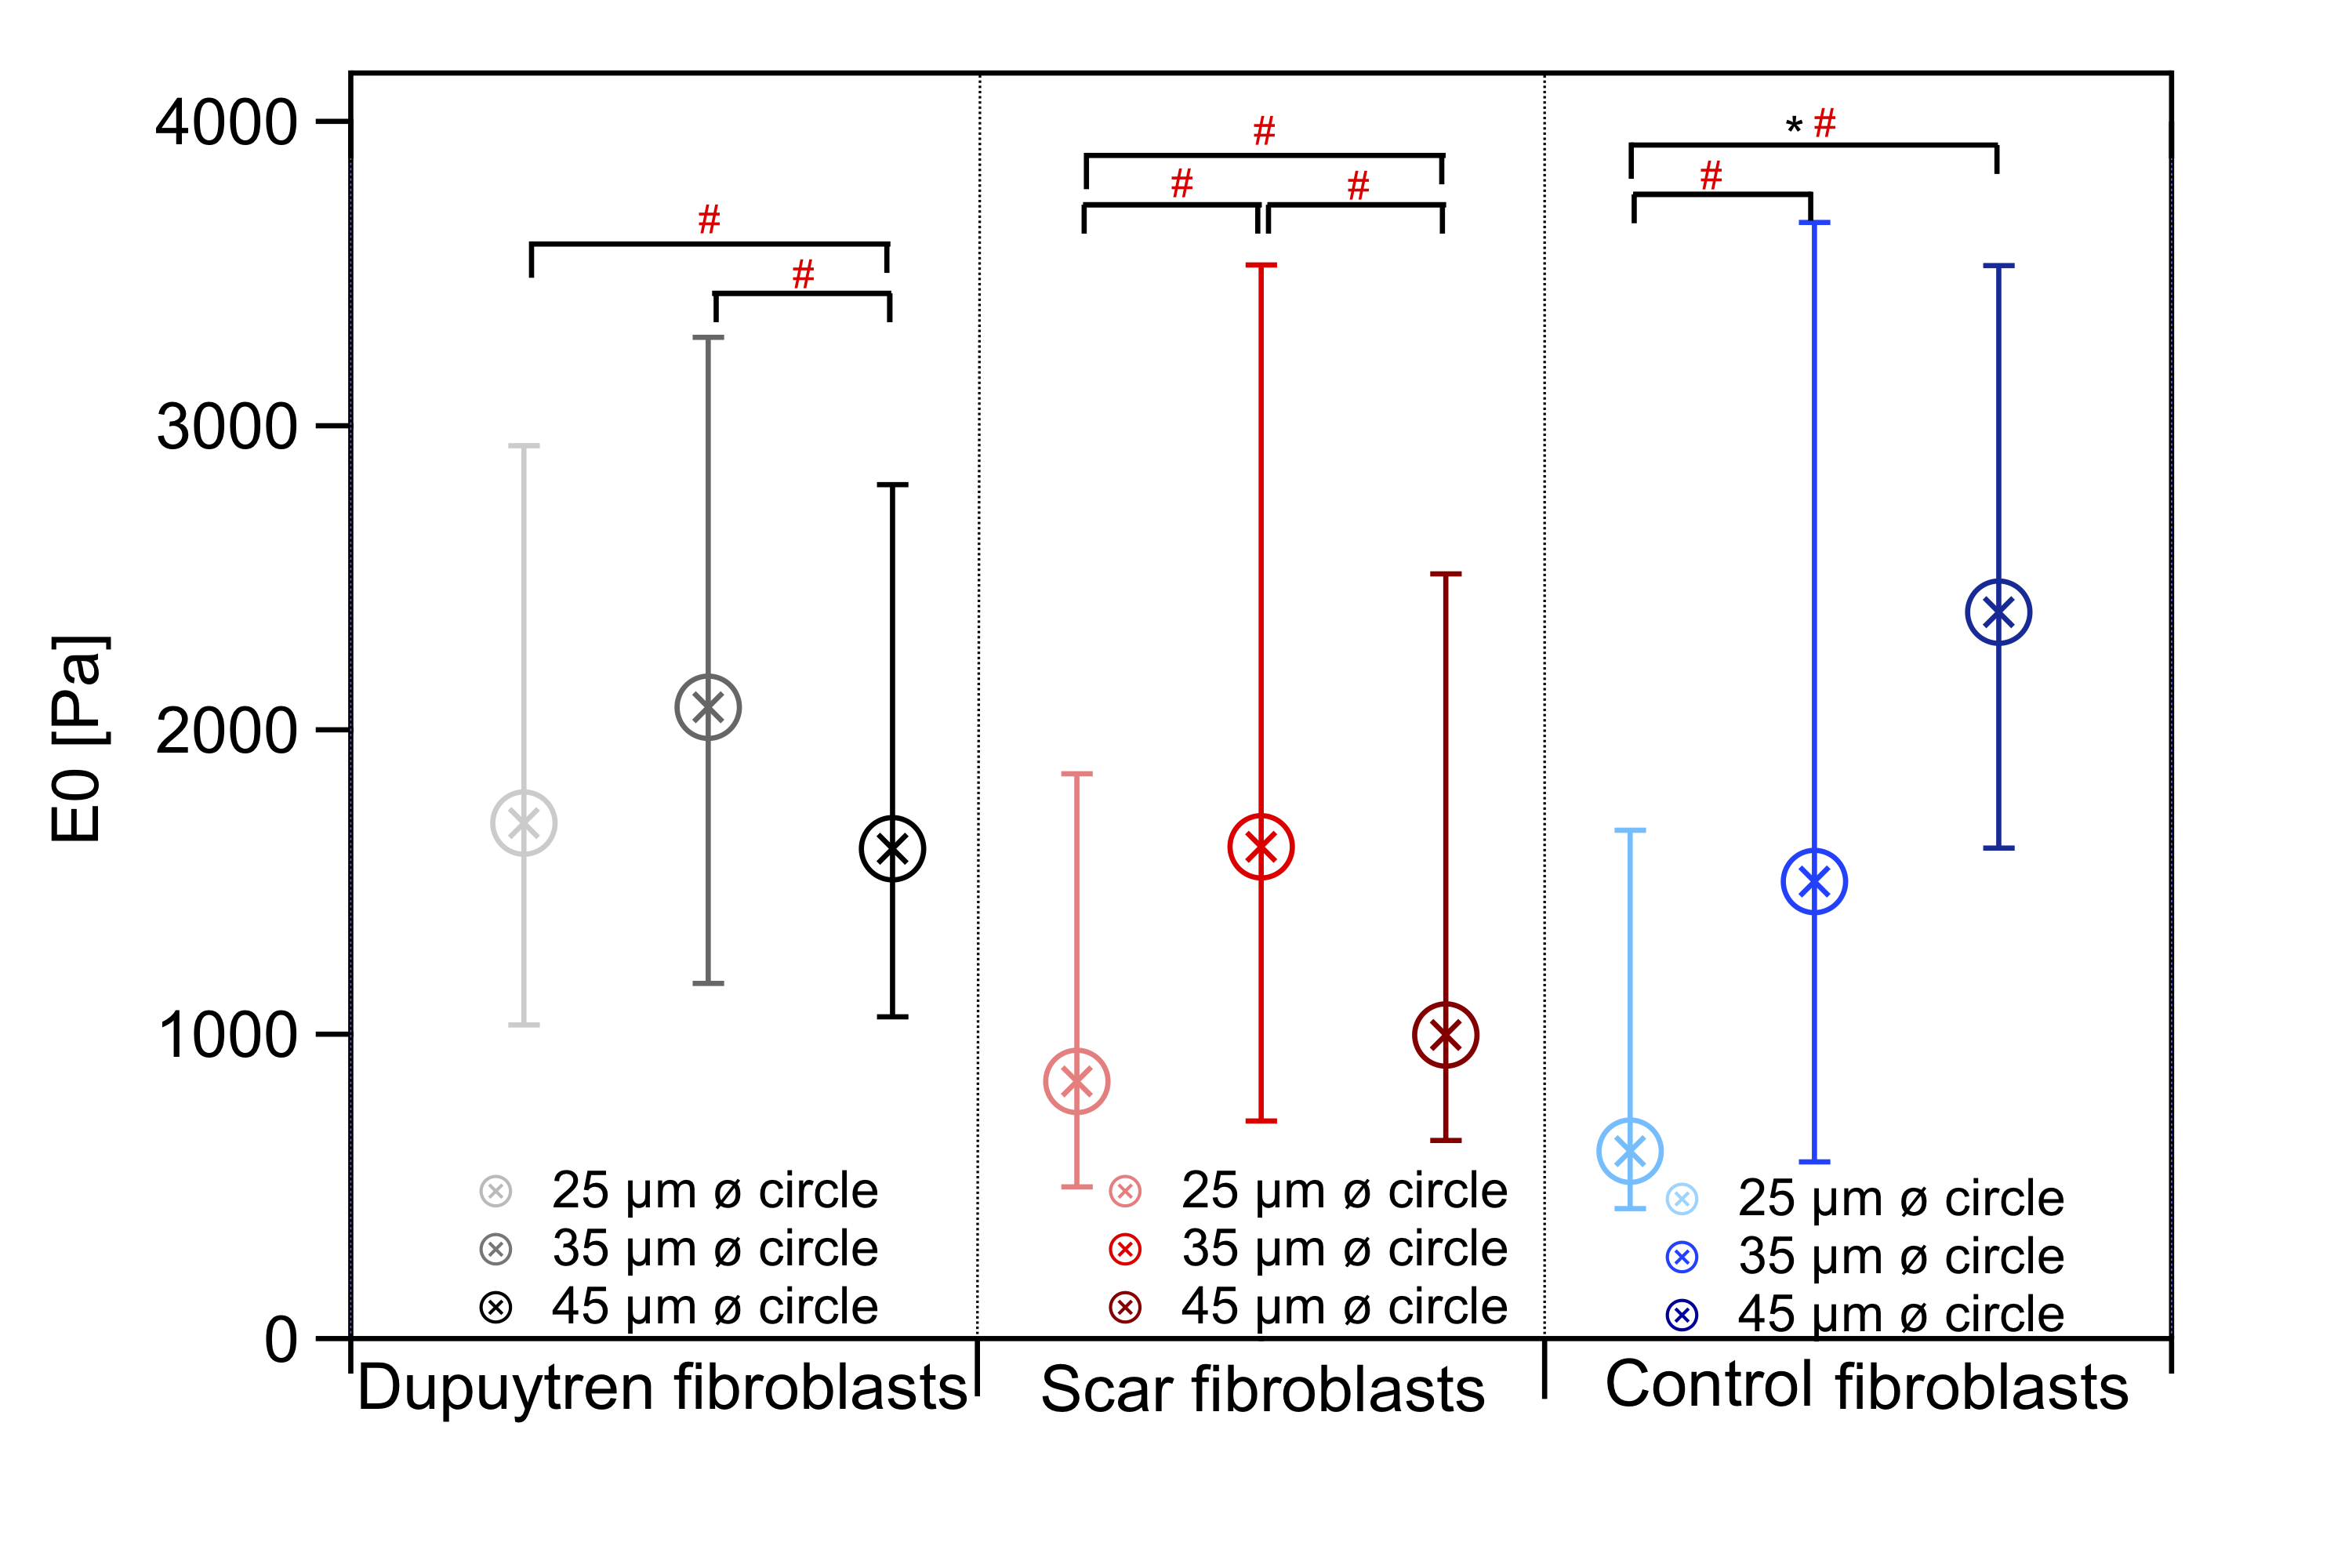


Figure 6 E0, scale factor of the storage and loss moduli. Box plot of E0 with themedian and 25/75 percentiles. Data shows information from different cells. Each colour represents one type of fibroblast, Dupuytren, scar and control in black, red and blue, respectively. Besides, within each group the colour gradient shows the cells patterned in each circular diameter, from the lightest to the darkest, goes from the 25 to the 45 µm circular diameter, respectively. Statistical analysis: Wilcoxon signed-rank test, * indicating p < 0.01 and Cohen’s d test with # indicating an effect size of 0.2 < d < 0.5 and ## indicating d >0.5. ø = diameter. (N = 15).


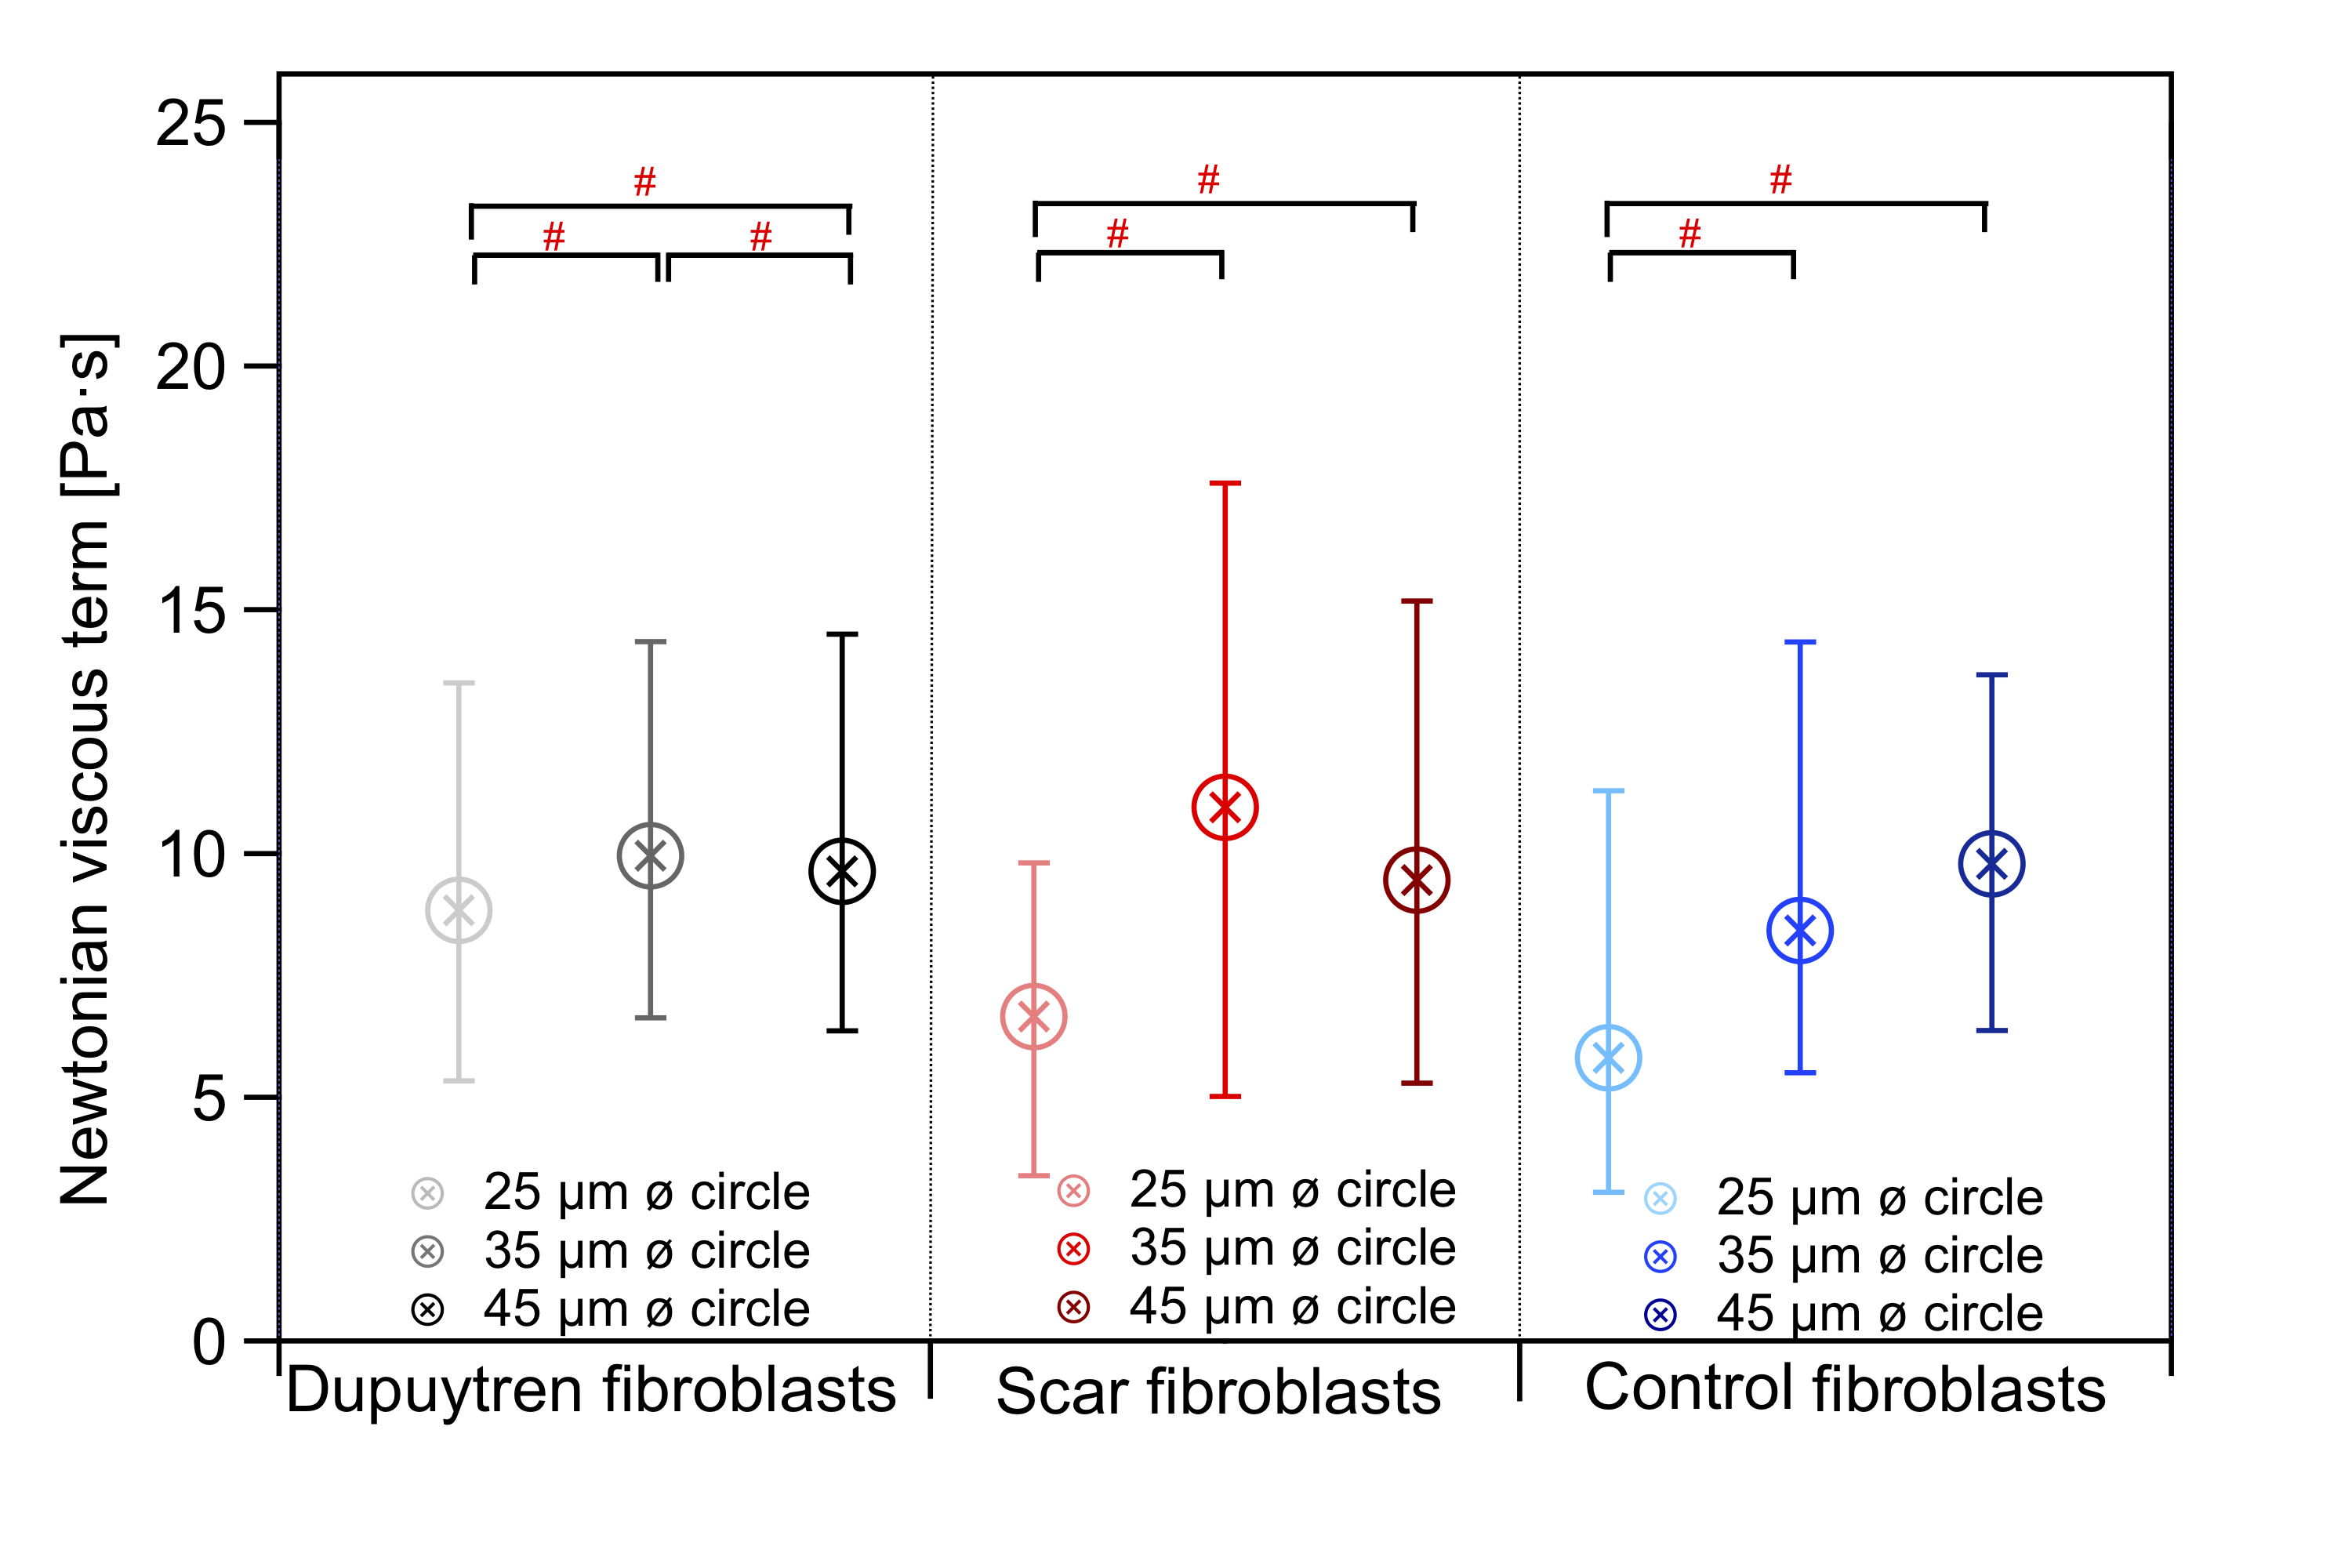


Figure 7 Box plot of μ (Newtonian viscous term) with themedian and 25/75 percentiles. Data shows information from different cells. Each colour represents one type of fibroblast, Dupuytren, scar and control in black, red and blue, respectively. Besides, within each group the colour gradient shows the cells patterned in each circular diameter, from the lightest to the darkest, goes from the 25 to the 45 µm ø circular diameter, respectively. Statistical analysis: Cohen’s d test with # indicating an effect size of 0.2 < d < 0.5 and ## indicating d >0.5. ø = diameter. Wilcoxon signed rank test was performed and showed no significant differences between any circular pattern diameter within each type of fibroblast (N = 15).


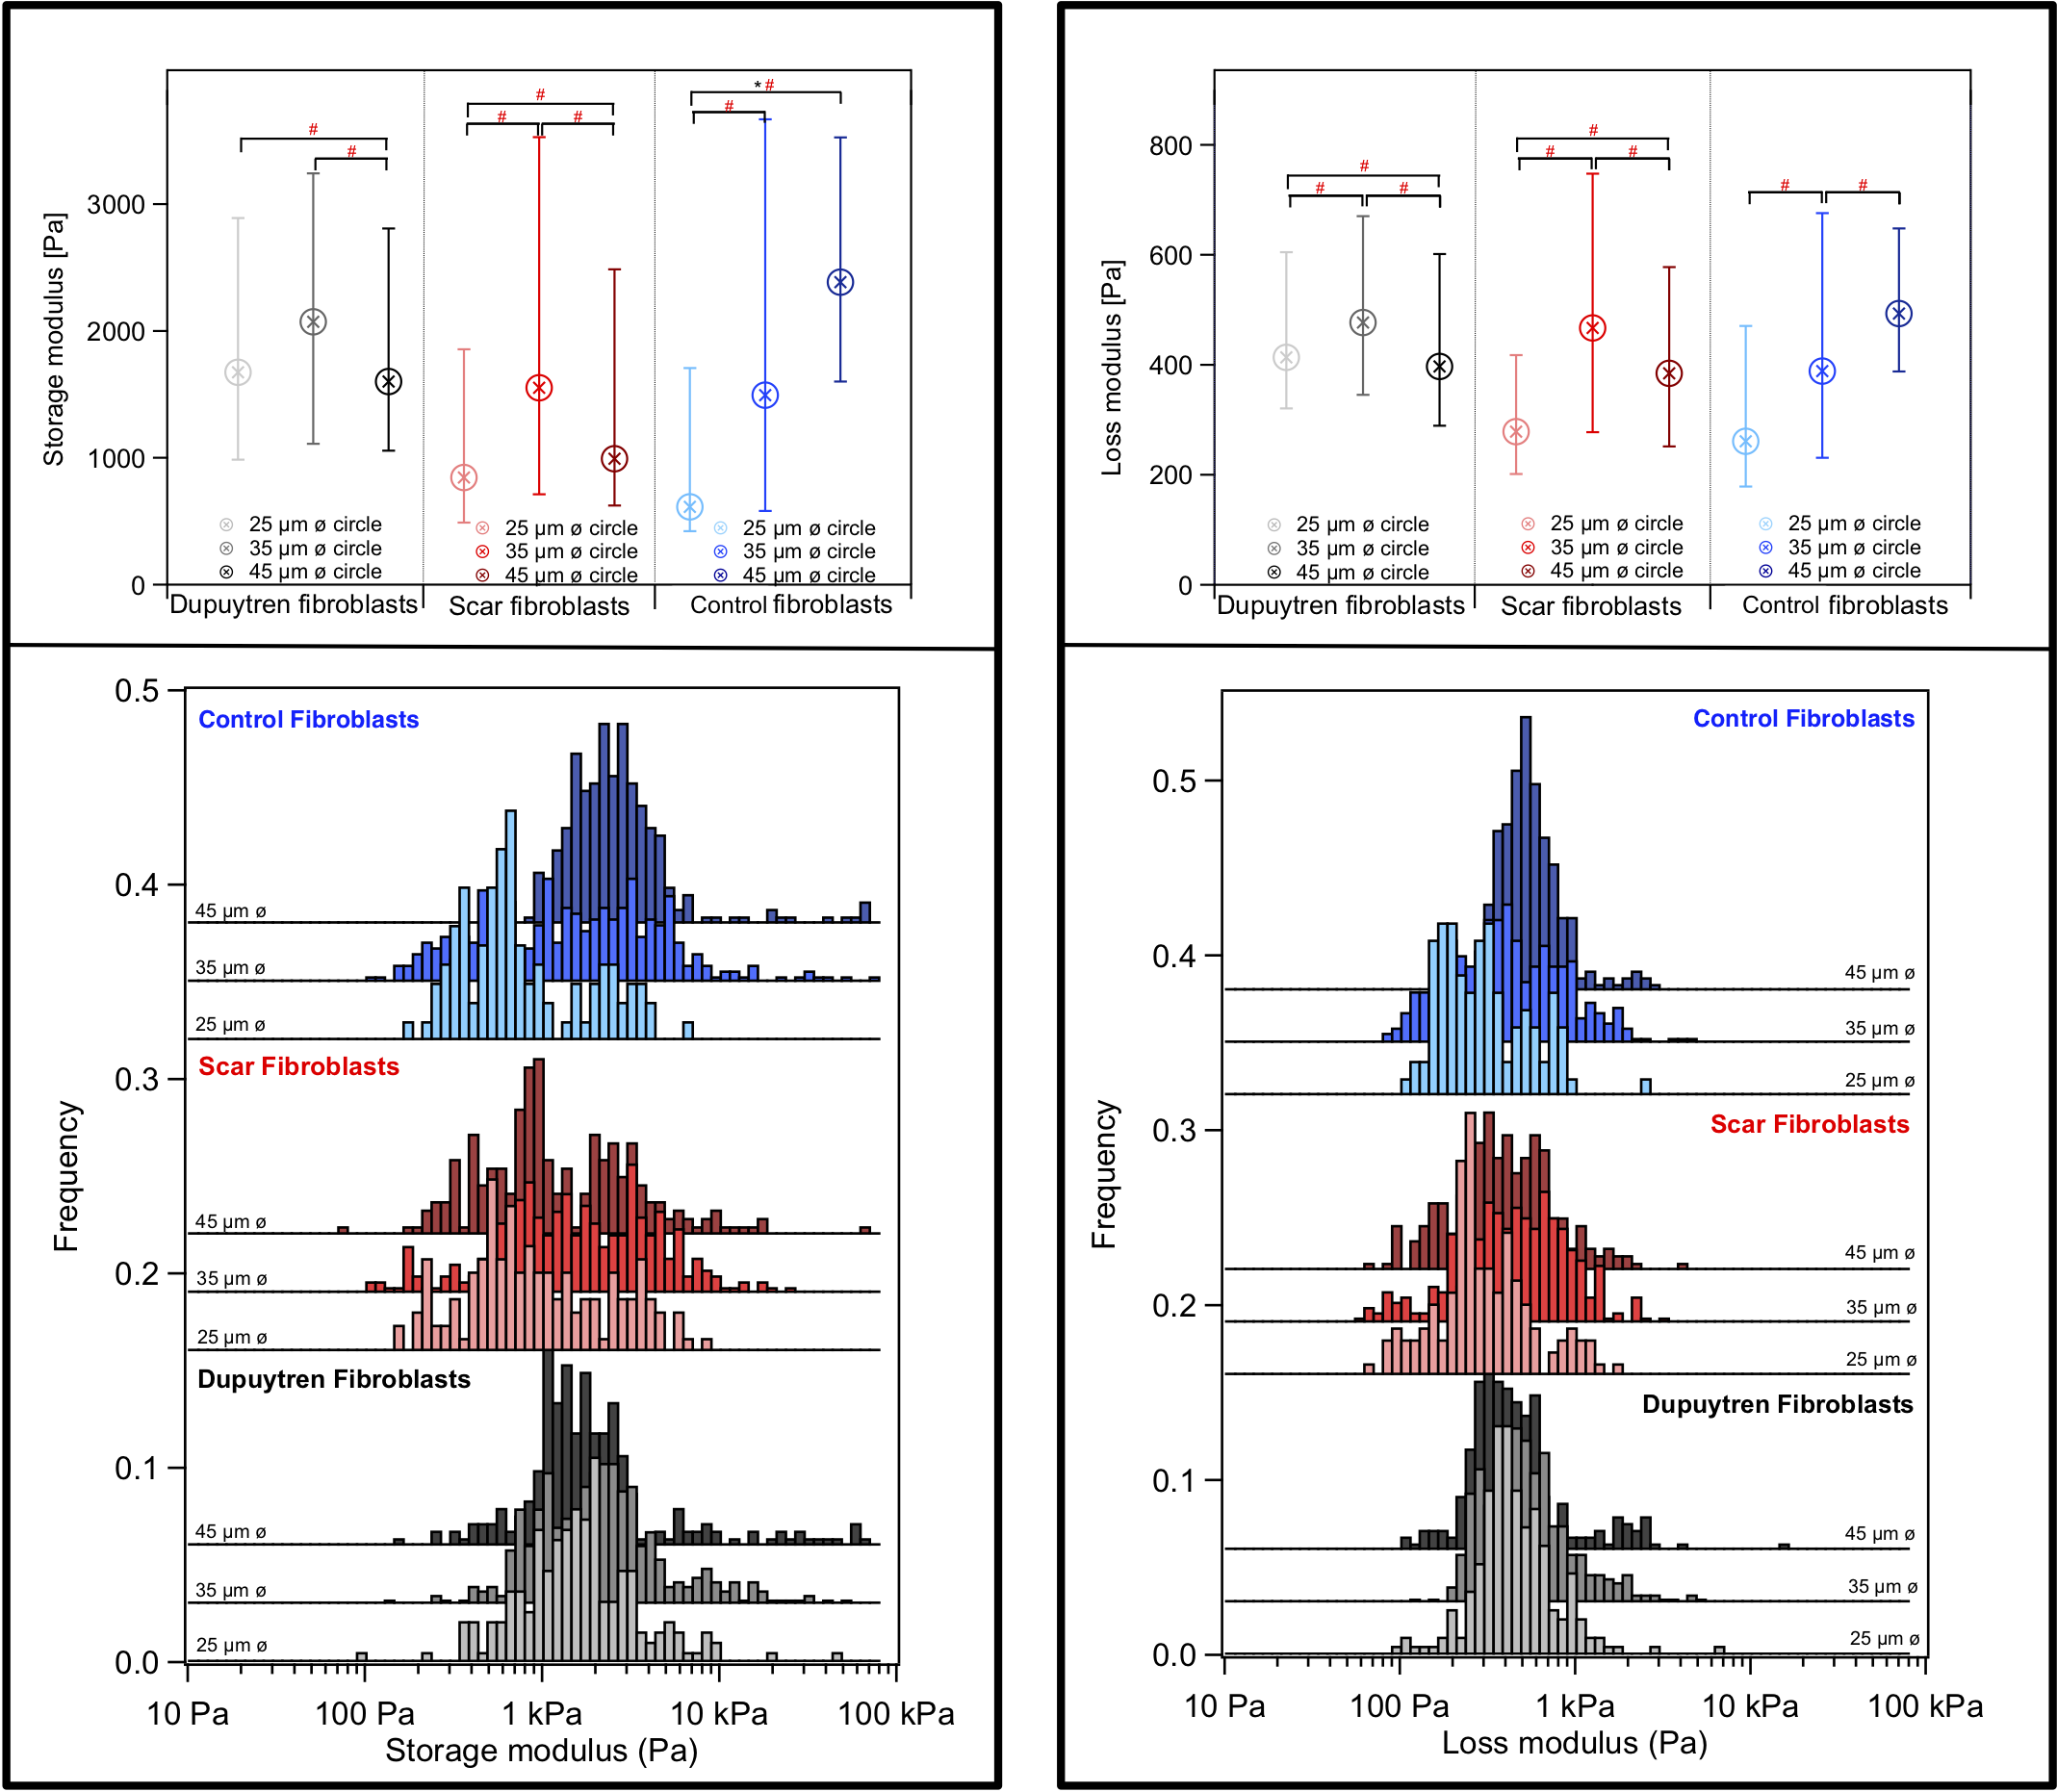


Figure 8 Median with 25/75 percentiles (above) and histogram display (below) of the storage and loss modulus at 1 Hz, left and right, respectively, of each fibroblasts type. Data shows information from different cells. Dupuytren fibroblasts are presented in black, scar fibroblasts in red and control in blue. Within each type of fibroblast there is a gradient in color, from lightest to darkest represents the patterned cells in 25 µm diameter circles, 35 µm diameter circles and 45 µm diameter circles, respectively. Statistical analysis: Wilcoxon signed-rank test, * indicating p < 0.01 and Cohen’s d test with # indicating an effect size of 0.2 < d < 0.5 and ## indicating d >0.5. ø = diameter (N = 15).


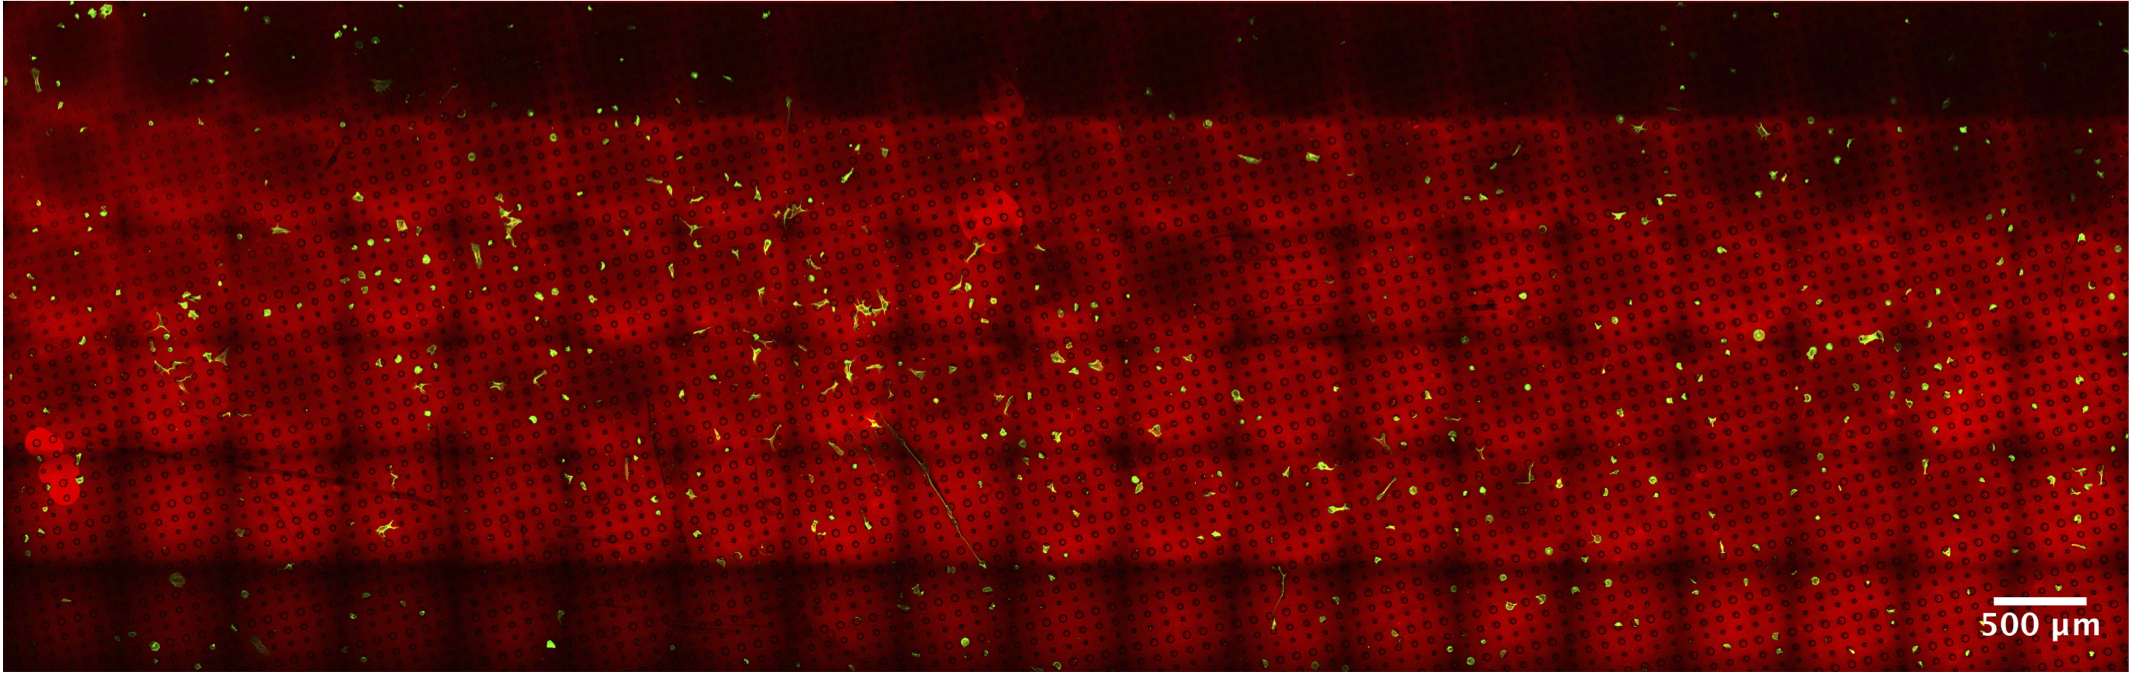


Figure 9 Scar fibroblasts patterned in fibronectin-coated circles. Actin fibers labeled in green, PLL-PEG layer in red.


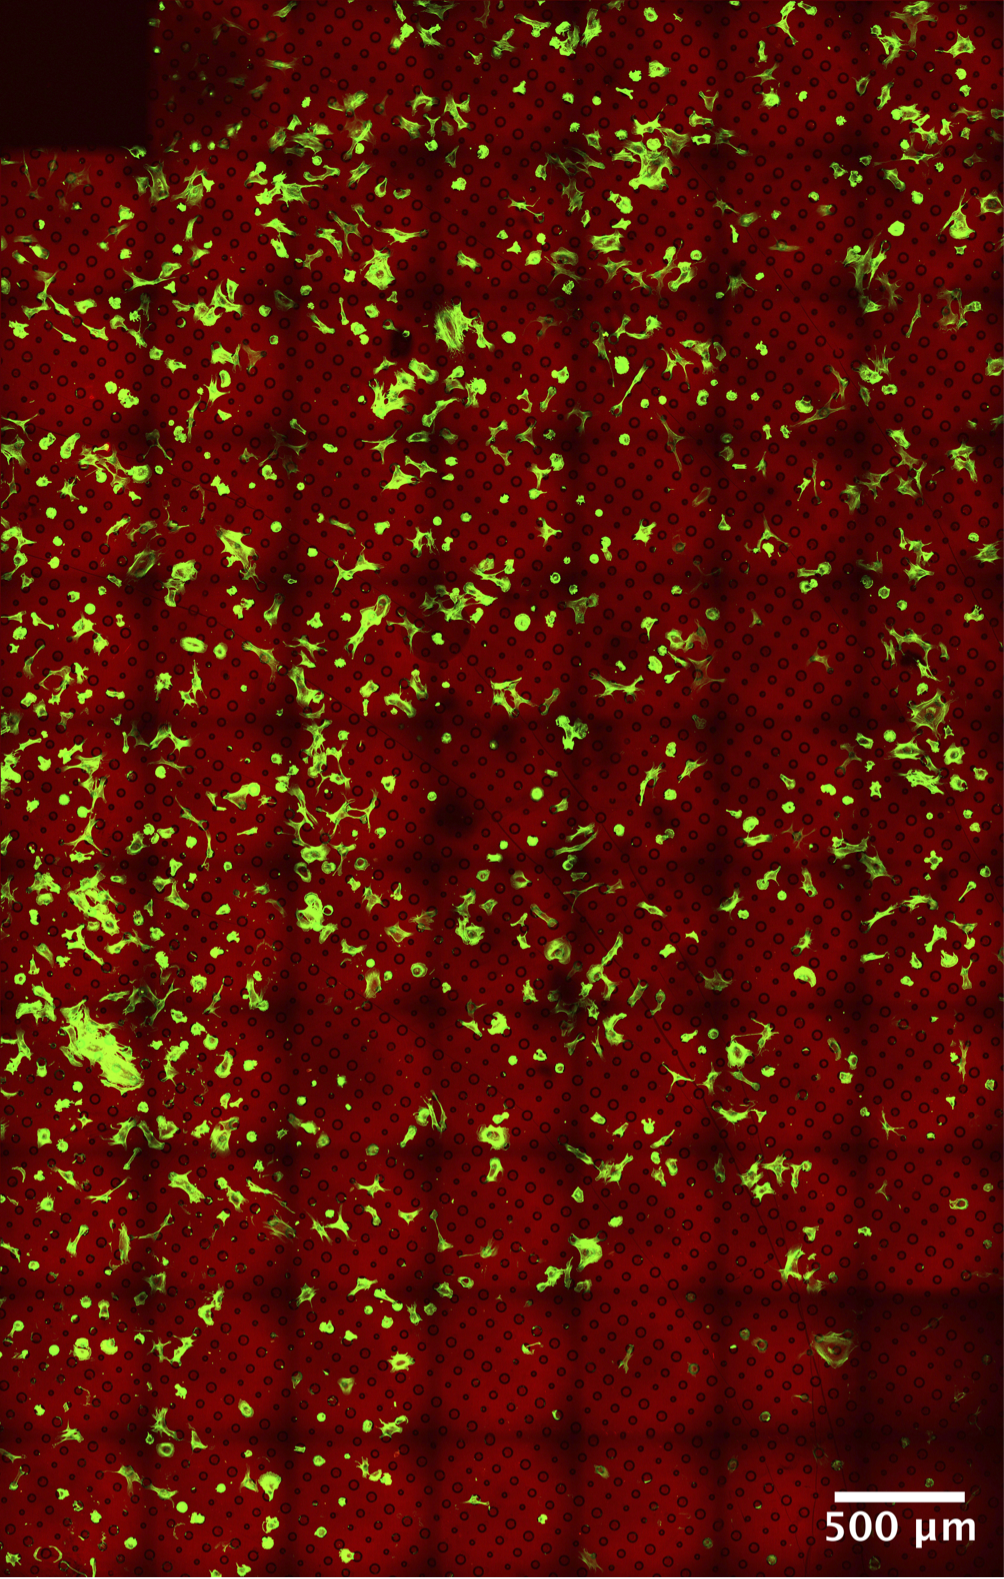


Figure 10 Control fibroblasts patterned in fibronectin-coated circles. Actin fibers labeled in green, PLL-PEG layer in red.


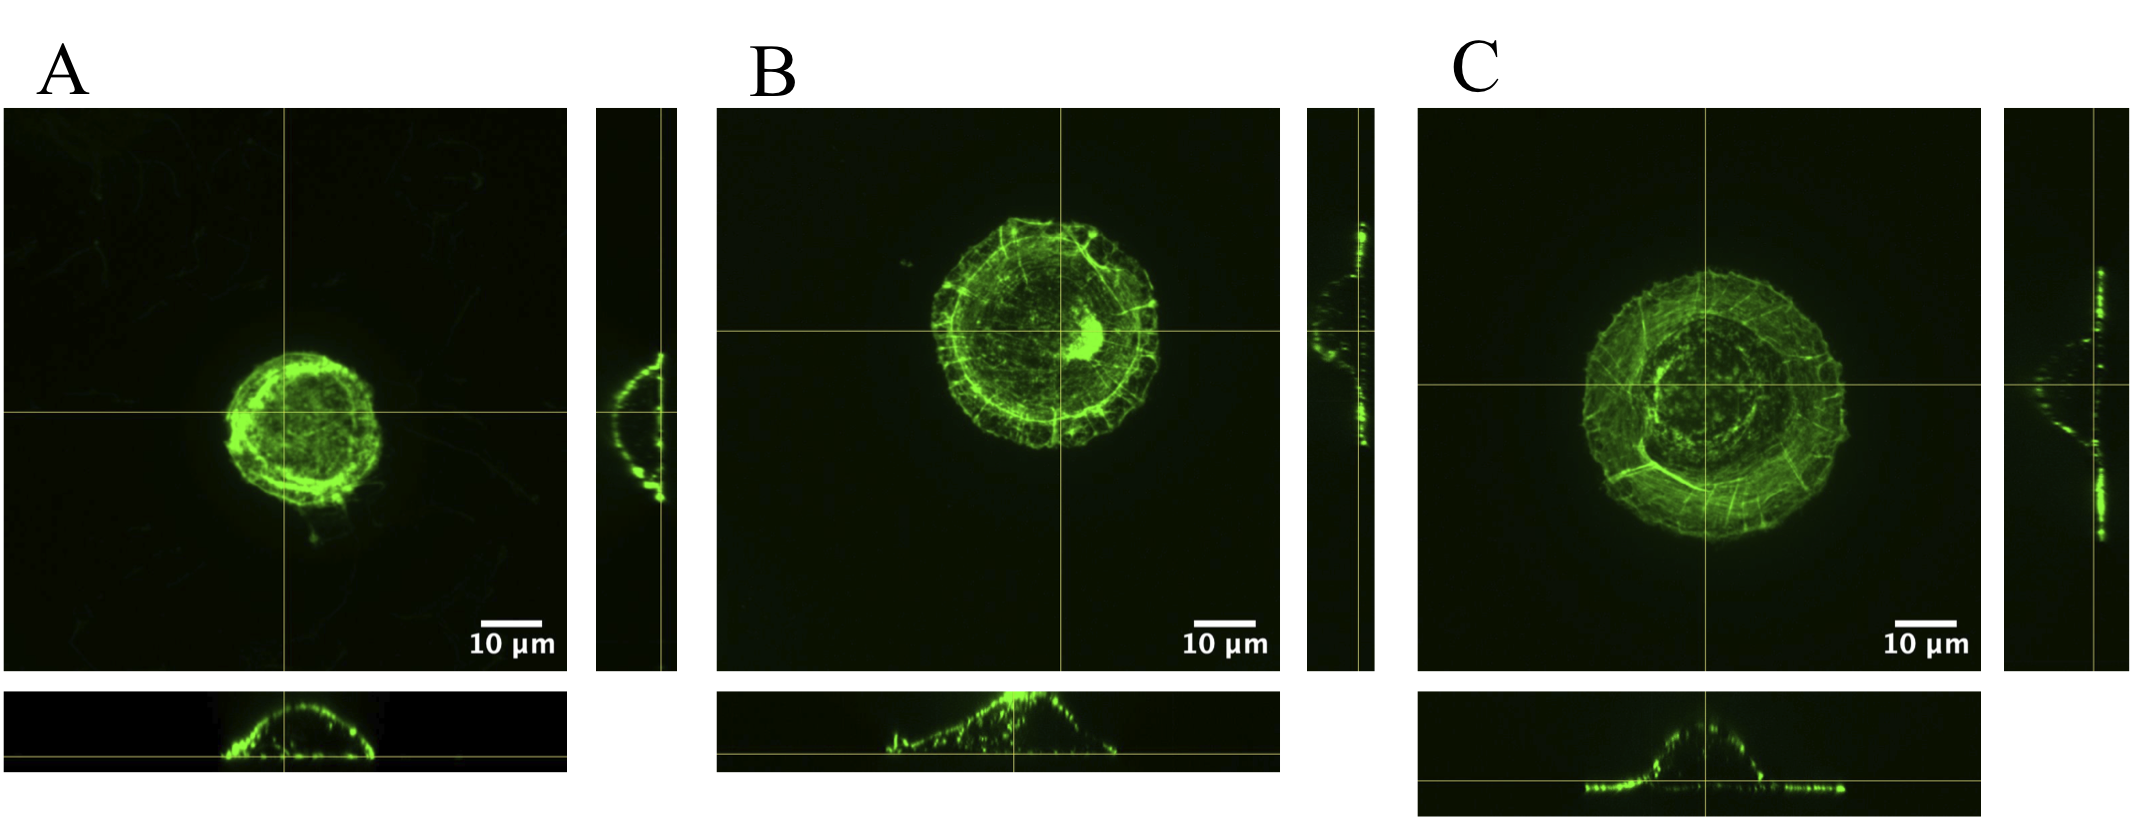


Figure 11 Z- and orthogonal projections of Dupuytren fibroblasts patterned in: A) 25-µm, B) 35-µm and C) 45-µm ø circles. Actin fibers labeled in green (N = 4).


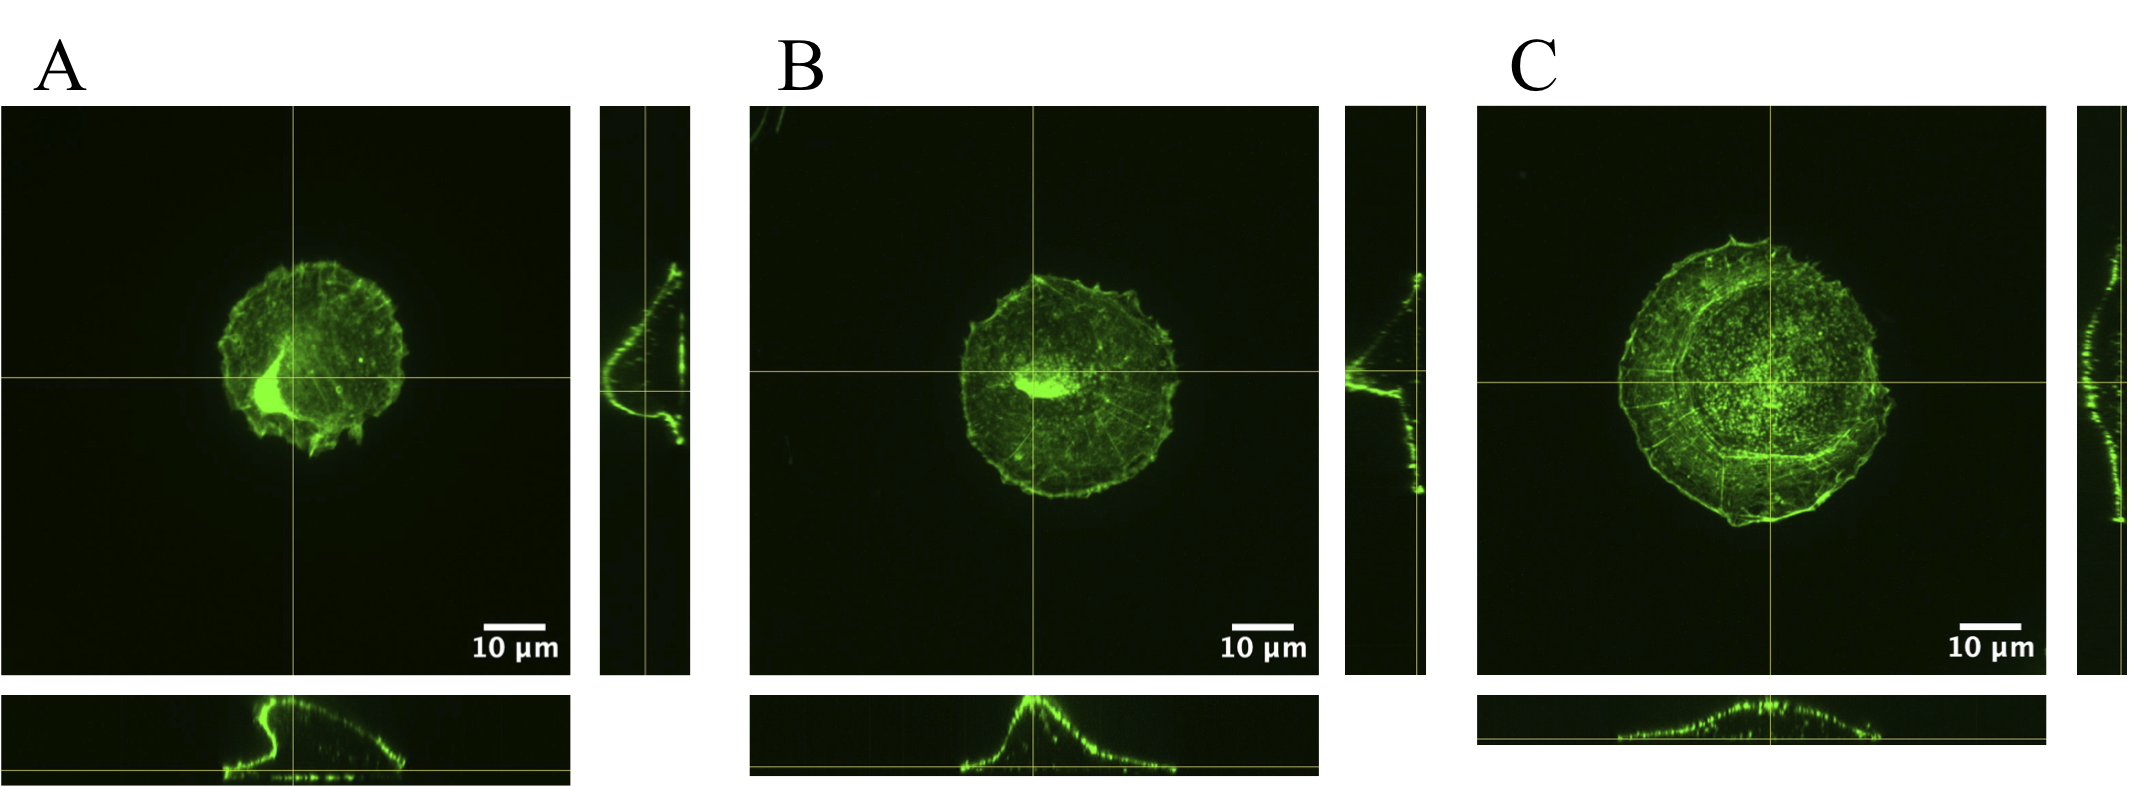


Figure 12 Z- and orthogonal projections of control fibroblasts patterned in: A) 25-µm, B) 35-µm and C) 45-µm ø circles. Actin fibers labeled in green (N = 4).


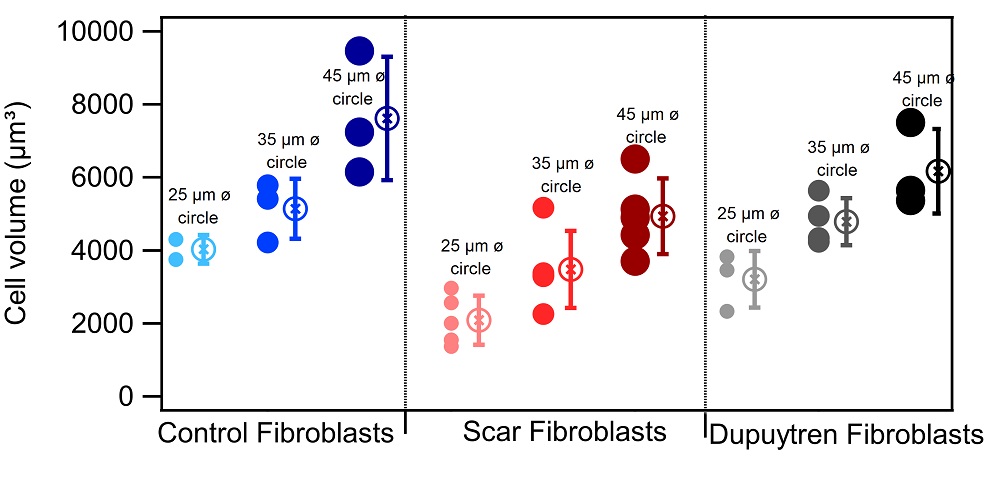


Figure 13 Estimation of relative cells volume from the xz projections from the fluorescent images. The dots represent the mean with the standard deviation (N = 4). The circles next to each mean value correspond to the individual measurements.


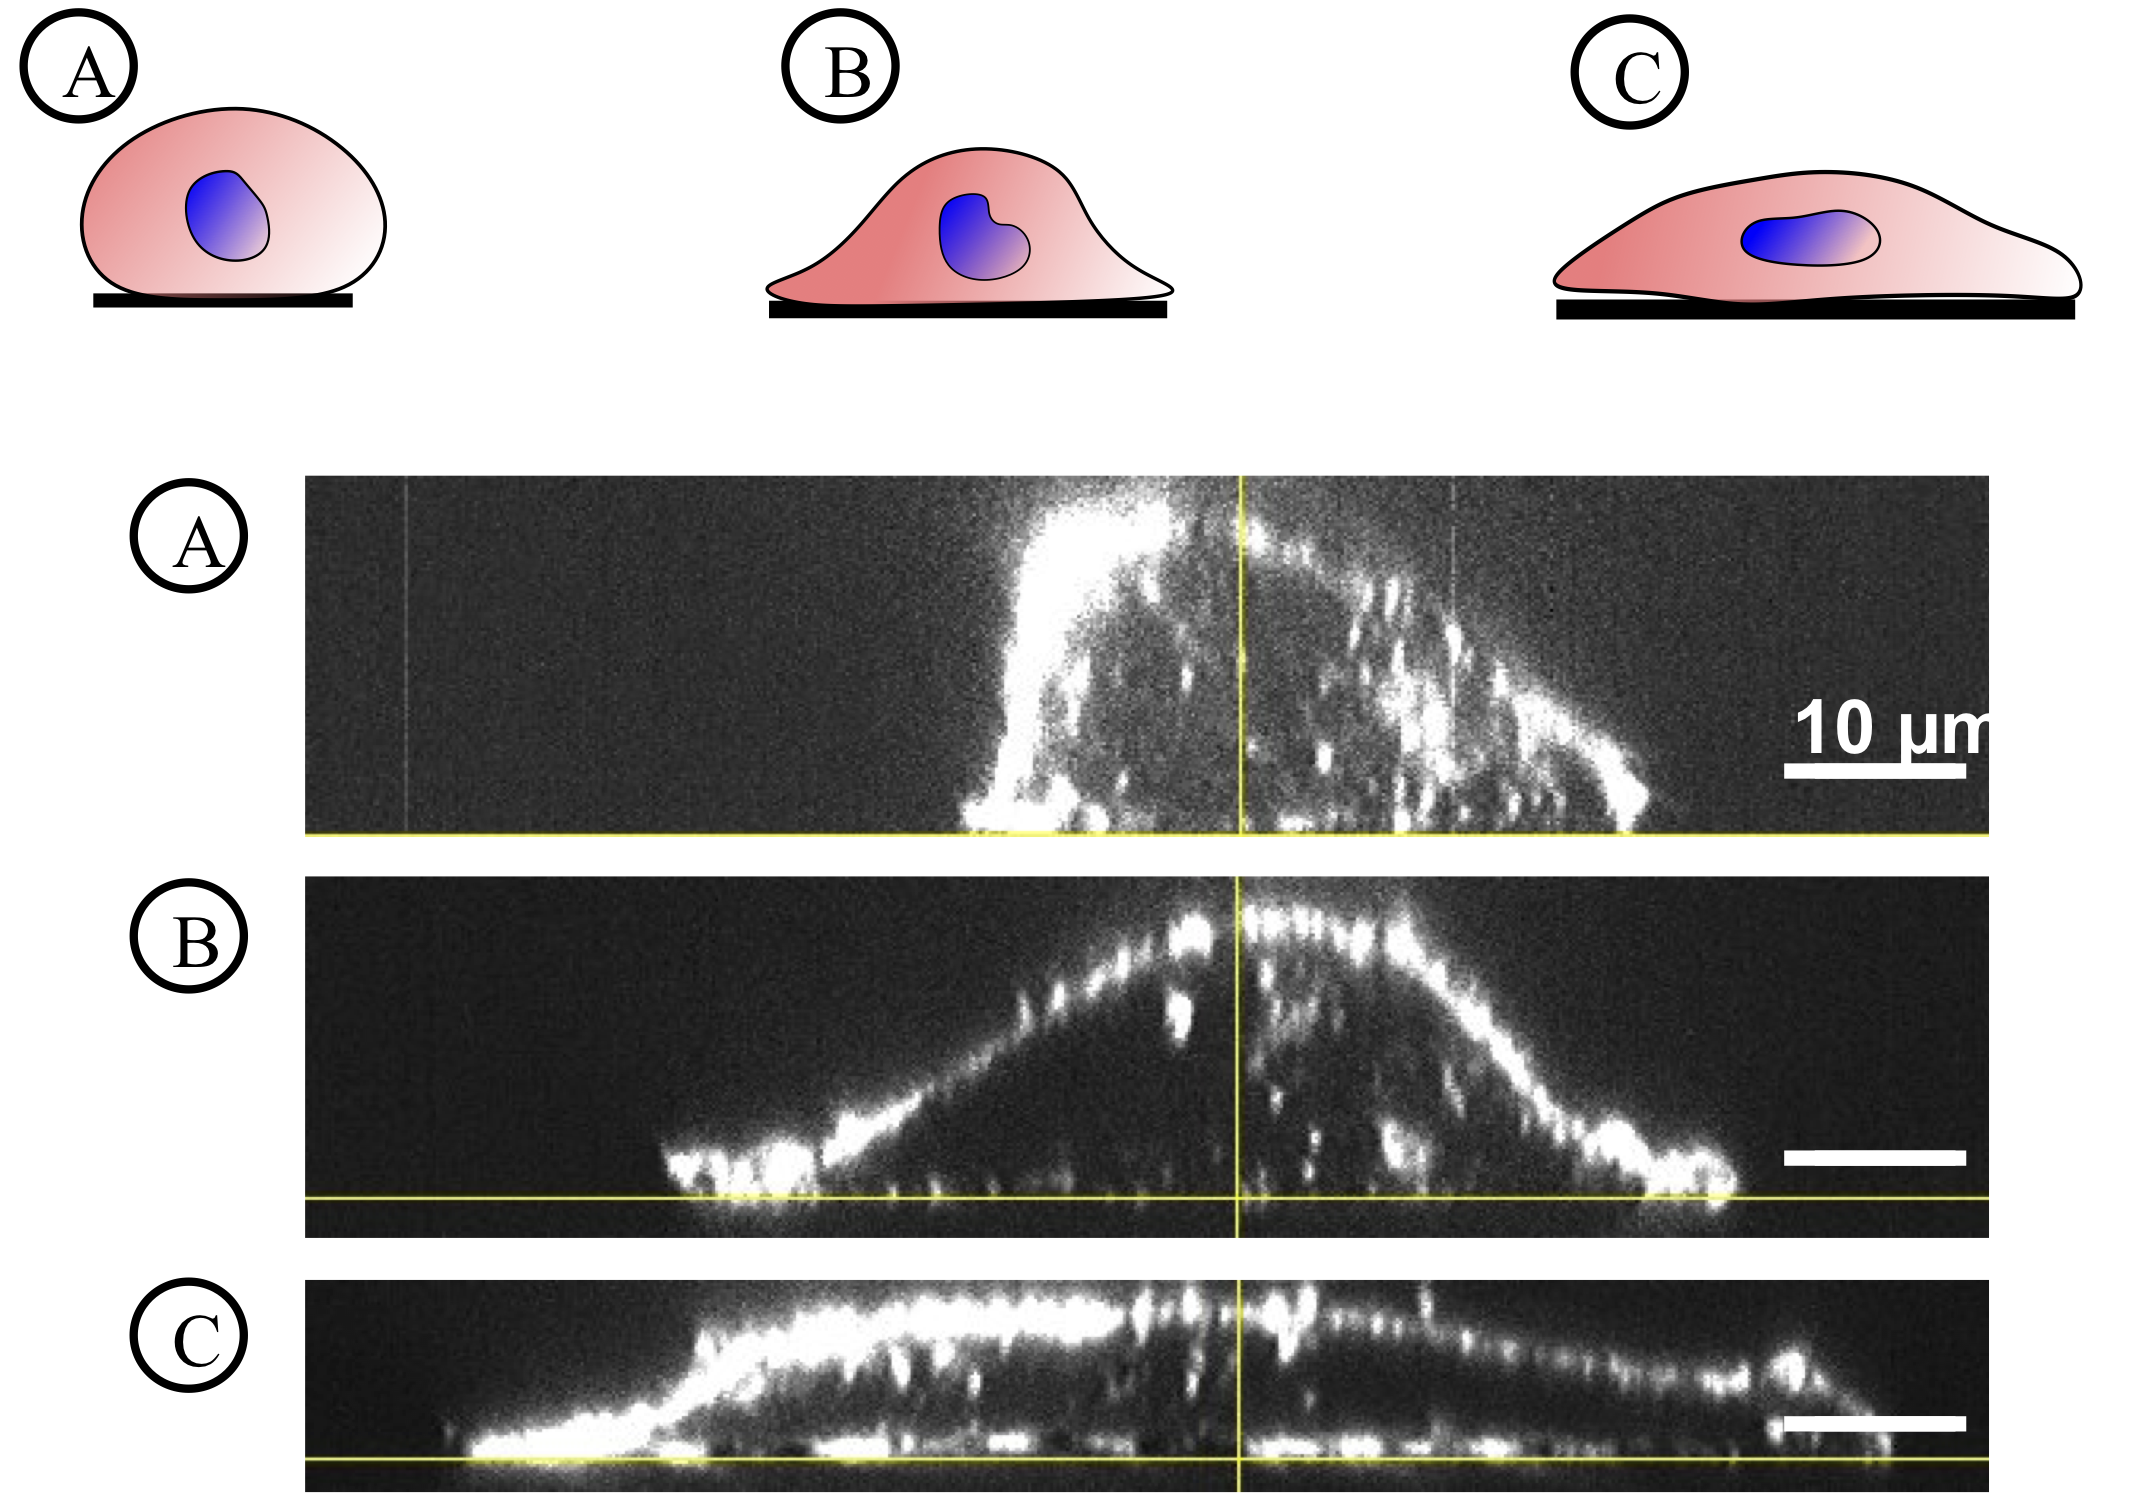


Figure 14 Control fibroblast xz projections when patterned in A) 25 µm diameter, B) 35 µm diameter and C) 45 µm diameter circles. We propose a possible explanation to the changes in cell height when increasing circle diameter but cells increase their volume. Control fibroblasts decrease their height but increase their volume with increasing pattern diameter. We suggest that the increase in volume may be because they spread more homogeneous through the pattern, reducing the height but gaining volume in the lamelipodia protrusions.


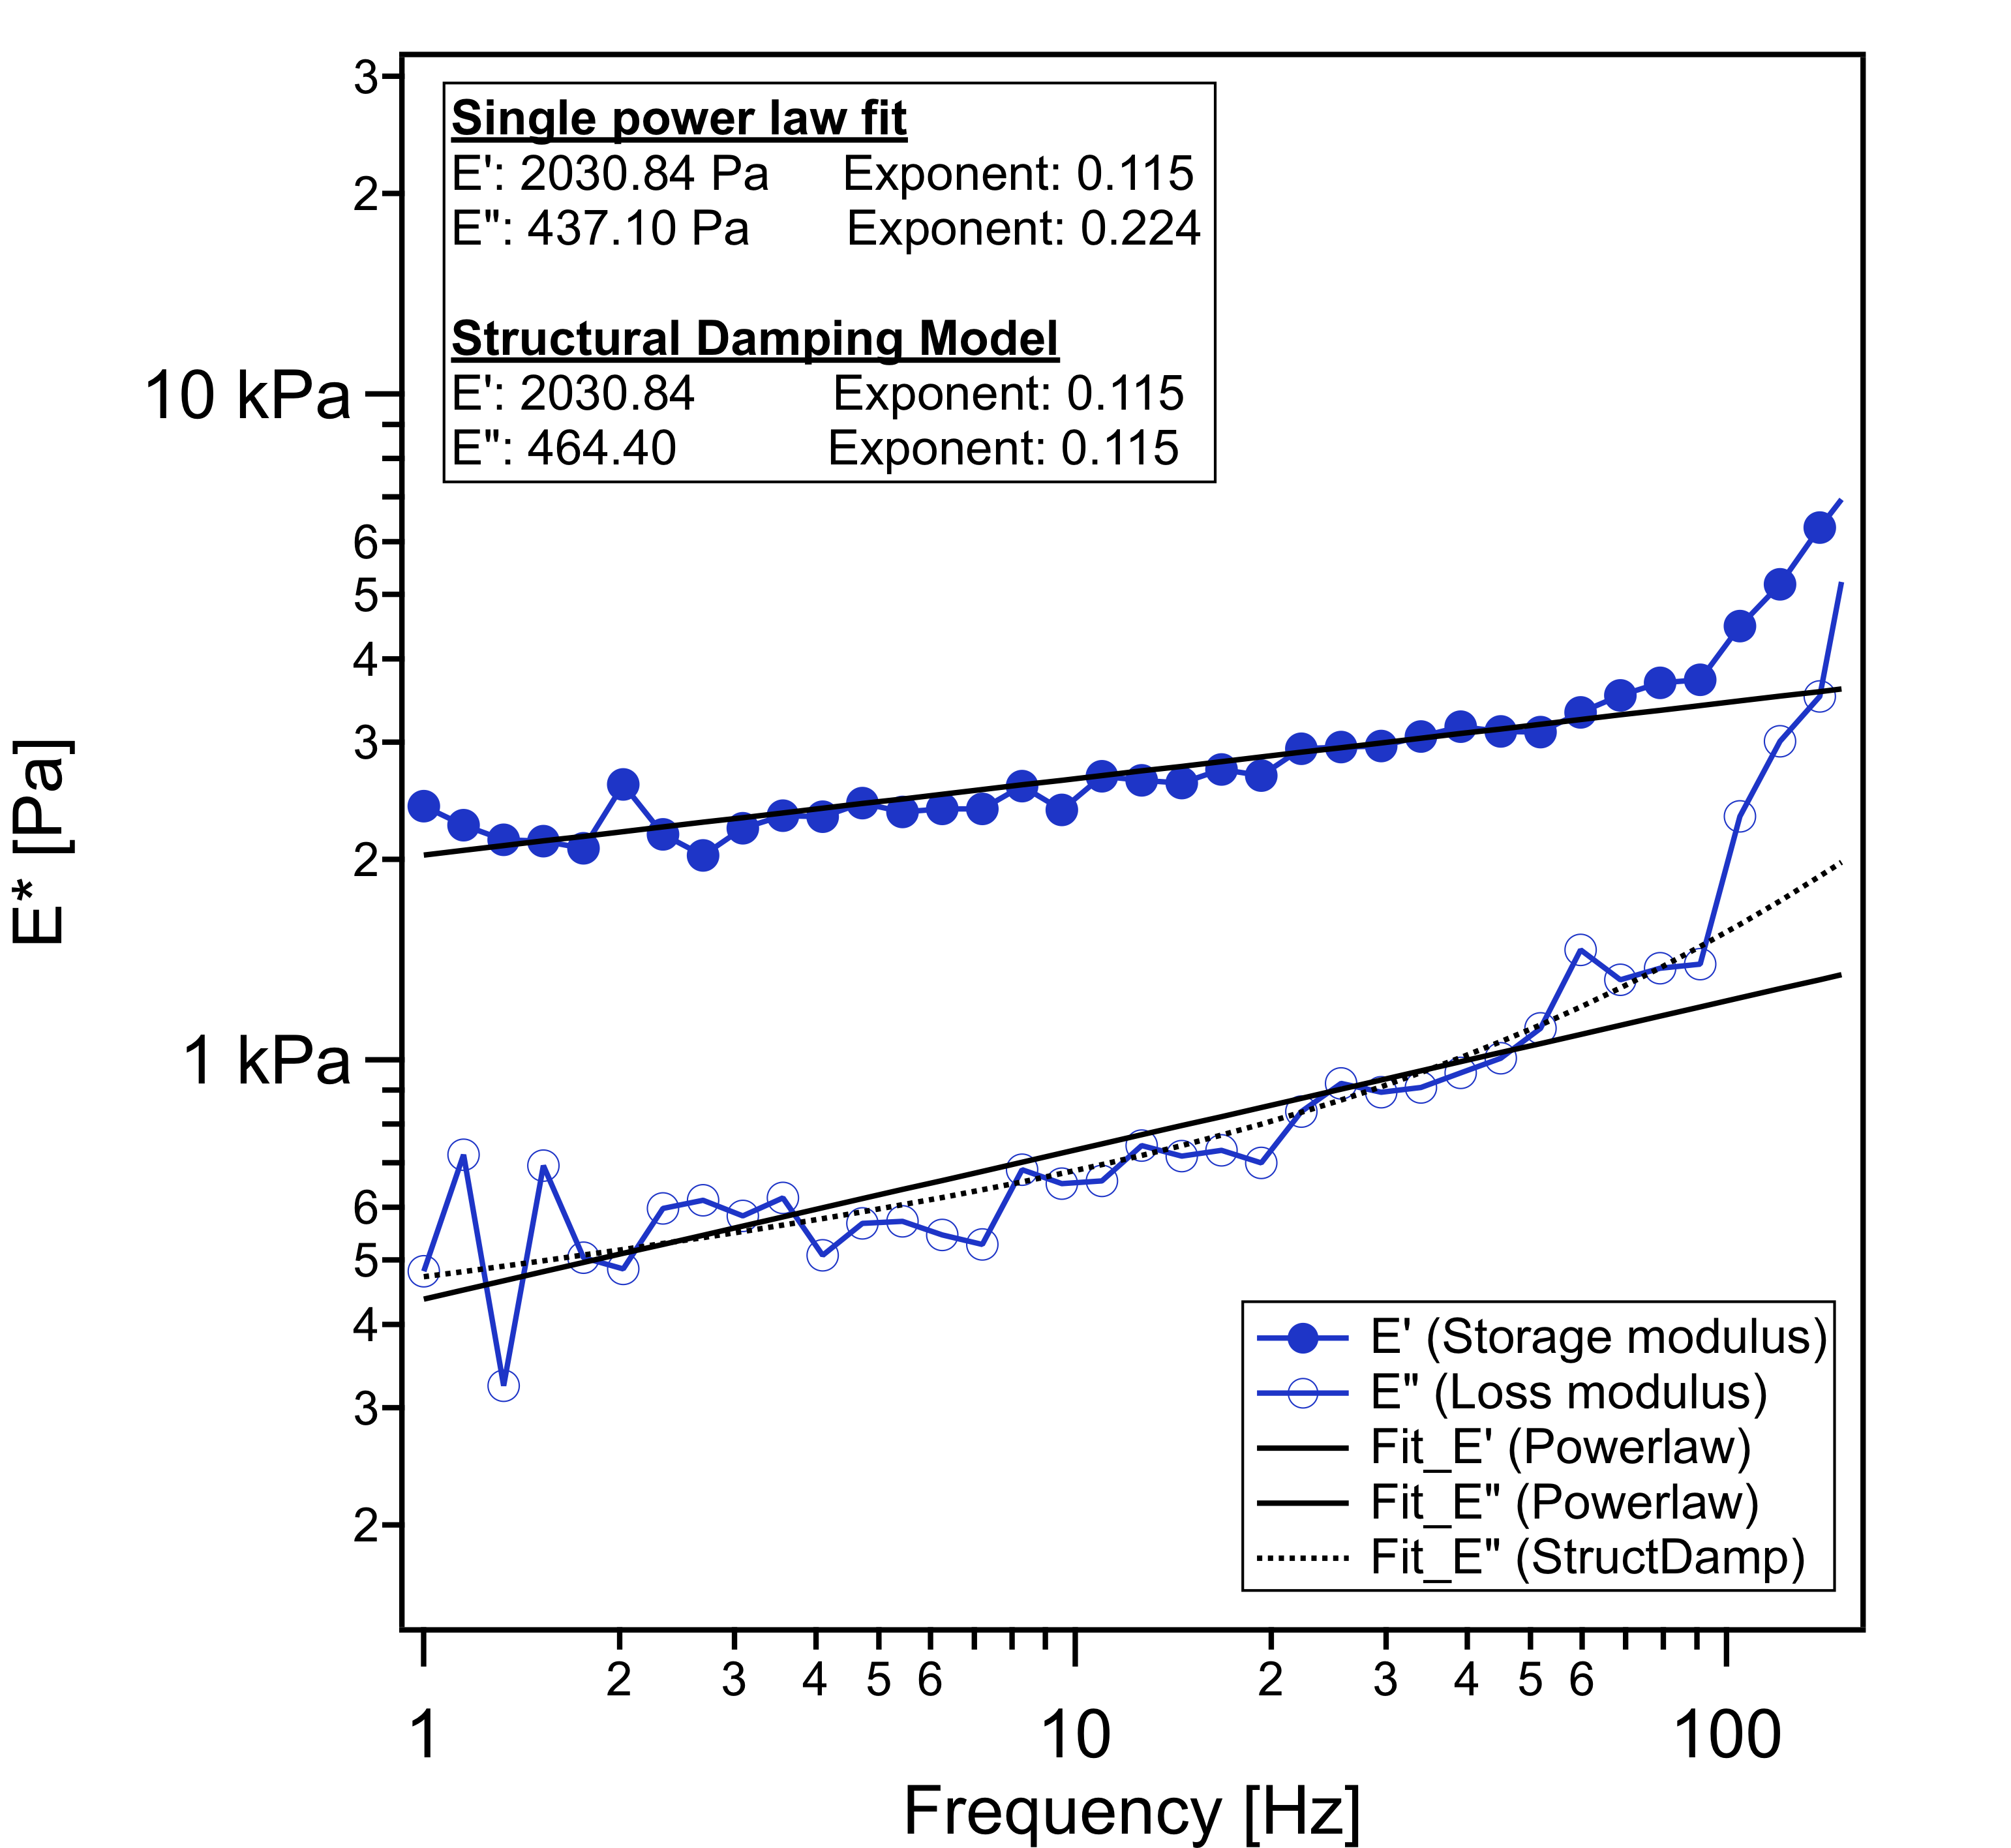


Figure 15 Frequency-dependent of complex elastic moduli of a control fibroblast pattern in a 45 µm circle. Close and open circles represent the storage (E’) and loss modulus (E”), respectively. Continuous line represents a single power law fit to the storage and loss modulus and dashed line represents power law structural damping fit. Single power law fit gives different exponents for storage and loss modulus due to the different frequency dependence and the structural damping provides one power law, which is the same for the storage and loss modulus. Data shown after viscous drag correction.
